# Supplementary material
Source: bioRxiv or medRxiv preprint supplement (http://www.medrxiv.org/highwire/filestream/72538/field_highwire_adjunct_files/8/2020.02.23.20027029-6.pdf)
Supplement: Supplementary file [file 2020.02.23.20027029-6.pdf]

Table S4

| Concordance | Space                                      | Feature                                                     | Status, BMI-naive | Status, BMI-aware |
|-------------|--------------------------------------------|-------------------------------------------------------------|-------------------|-------------------|
| DIFF        | Host-Clinical                              | eGFR                                                        | old: YES-DEPLETED | new: NS           |
| DIFF        | Host-Clinical                              | weight                                                      | old: YES-DEPLETED | new: NS           |
| DIFF        | Host-Clinical                              | weight                                                      | old: YES-DEPLETED | new: NS           |
| DIFF        | Immune                                     | 5_CD24- CD45RO+ CD25+ CD4+ % of CD4high CD8-                | old: NS           | new: YES-DEPLETED |
| DIFF        | Immune                                     | 5_CD25- CD4+ % of CD4high cells                             | old: YES-ENRICHED | new: NS           |
| DIFF        | Immune                                     | 2_CD39- CD31+ CD25high CD127low CD4+ /ul                    | old: NS           | new: YES-DEPLETED |
| DIFF        | Immune                                     | 8_TNFA- IL-5- IL-17- % of CD3+                              | old: YES-ENRICHED | new: NS           |
| DIFF        | Immune                                     | 3_CD11c+ CD14- CD16- HLA-DR+ CD4dim/- % of PBMC             | old: YES-ENRICHED | new: NS           |
| DIFF        | Immune                                     | 7_Foxp3+ Ki67- CD4+ CD3+ /ul                                | old: NS           | new: YES-ENRICHED |
| DIFF        | Immune                                     | 6_CD25+ % of CD4+                                           | old: NS           | new: YES-DEPLETED |
| DIFF        | Immune                                     | 6_CD25+ % of CD4+                                           | old: NS           | new: YES-DEPLETED |
| DIFF        | Immune                                     | 8_TNFA- IL-2- IL-17- % of CD3+                              | old: YES-ENRICHED | new: NS           |
| DIFF        | Immune                                     | 8_TNFA- IL-2- % of IL-17- CD3+                              | old: YES-ENRICHED | new: NS           |
| DIFF        | Immune                                     | 9_IL2+ TNFA+ Va7.2+ CD161+ CD4- CD3+ /ul                    | old: YES-DEPLETED | new: NS           |
| DIFF        | Immune                                     | 5_CD24- CD45RO- % of CD8+ CD4-                              | old: YES-DEPLETED | new: NS           |
| DIFF        | Immune                                     | 6_CD25+ % of CD4+2                                          | old: NS           | new: YES-DEPLETED |
| DIFF        | Immune                                     | 6_CD25+ % of CD4+2                                          | old: NS           | new: YES-DEPLETED |
| DIFF        | Immune                                     | 6_CD25- % of CD4+                                           | old: YES-ENRICHED | new: NS           |
| DIFF        | Immune                                     | 6_CD25- % of CD4+                                           | old: YES-ENRICHED | new: NS           |
| DIFF        | Immune                                     | 8_TNFA- IL-5- % of IL-17- CD3+                              | old: YES-ENRICHED | new: NS           |
| DIFF        | Immune                                     | 1_CD4+ CD8- % of CD3+                                       | old: NS           | new: YES-DEPLETED |
| DIFF        | Immune                                     | 9_IL2+ TNFA+ Va7.2+ CD161 % of CD3+                         | old: YES-DEPLETED | new: NS           |
| DIFF        | Immune                                     | 5_CD4_Tcm/Treg                                              | old: YES-ENRICHED | new: NS           |
| DIFF        | Immune                                     | 5_CD4_Tcm/Treg                                              | old: YES-ENRICHED | new: NS           |
| DIFF        | Immune                                     | 6_CD161+ CCR6+ CXCR3- CD25+ CD4+ /ul                        | old: YES-DEPLETED | new: NS           |
| DIFF        | Microbiome-Function-KEGG/GMM-rarefied      | M00277: PTS system, N-acetylgalactosamine-specific II c     | old: YES-DEPLETED | new: NS           |
| DIFF        | Microbiome-Function-KEGG/GMM-rarefied      | M00185: Sulfate transport system                            | old: YES-ENRICHED | new: NS           |
| DIFF        | Microbiome-Function-KEGG/GMM-rarefied      | M00273: PTS system, fructose-specific II component          | old: NS           | new: YES-DEPLETED |
| DIFF        | Microbiome-Function-KEGG/GMM-rarefied      | M00486: CitA-CitB (citrate fermentation) two-component r    | old: YES-DEPLETED | new: NS           |
| DIFF        | Microbiome-Function-KEGG/GMM-rarefied      | M00486: CitA-CitB (citrate fermentation) two-component r    | old: YES-ENRICHED | new: NS           |
| DIFF        | Microbiome-Function-KEGG/GMM-rarefied      | M00333: Type IV secretion system                            | old: NS           | new: YES-DEPLETED |
| DIFF        | Microbiome-Function-KEGG/GMM-rarefied      | M00333: Type IV secretion system                            | old: NS           | new: YES-ENRICHED |
| DIFF        | Microbiome-Function-KEGG/GMM-rarefied      | M00737: Bacitracin resistance, VraDE transporter            | old: YES-DEPLETED | new: NS           |
| DIFF        | Microbiome-Function-KEGG/GMM-rarefied      | M00057: Glycosaminoglycan biosynthesis, linkage tetrass     | old: NS           | new: YES-ENRICHED |
| DIFF        | Microbiome-Function-KEGG/GMM-rarefied      | M00057: Glycosaminoglycan biosynthesis, linkage tetrass     | old: NS           | new: YES-DEPLETED |
| DIFF        | Microbiome-Taxonomy-Class-mOTU2-rarefied   | Bacteria class incertae sedis                               | old: YES-DEPLETED | new: NS           |
| DIFF        | Microbiome-Taxonomy-Genus-16S              | Bacteria;Firmicutes;Clostridia;Clostridiales;Lachnospirace  | old: NS           | new: YES-ENRICHED |
| DIFF        | Microbiome-Taxonomy-Genus-16S              | Bacteria;Firmicutes;Clostridia;Clostridiales;Ruminococcac   | old: YES-ENRICHED | new: NS           |
| DIFF        | Microbiome-Taxonomy-Genus-16S              | Bacteria;Firmicutes;Clostridia;Clostridiales;Ruminococcac   | old: YES-ENRICHED | new: NS           |
| DIFF        | Microbiome-Taxonomy-Genus-mOTU2-rarefied   | Anaerotruncus                                               | old: YES-ENRICHED | new: NS           |
| DIFF        | Microbiome-Taxonomy-Genus-mOTU2-rarefied   | Anaerotruncus                                               | old: YES-ENRICHED | new: NS           |
| DIFF        | Microbiome-Taxonomy-Genus-mOTU2-rarefied   | Bacteria gen. incertae sedis                                | old: YES-DEPLETED | new: NS           |
| DIFF        | Microbiome-Taxonomy-Order-16S              | Bacteria;Firmicutes;Erysipelotrichia;Erysipelotrichales     | old: YES-DEPLETED | new: NS           |
| DIFF        | Microbiome-Taxonomy-OTU-16S                | OTU_147                                                     | old: NS           | new: YES-ENRICHED |
| DIFF        | Microbiome-Taxonomy-OTU-16S                | OTU_80                                                      | old: NS           | new: YES-DEPLETED |
| DIFF        | Microbiome-Taxonomy-OTU-16S                | OTU_97                                                      | old: YES-ENRICHED | new: NS           |
| DIFF        | Microbiome-Taxonomy-OTU-mOTU2-rarefied     | unknown Clostridiales [meta_mOTU_v2_6602]                   | old: YES-ENRICHED | new: NS           |
| DIFF        | Microbiome-Taxonomy-OTU-mOTU2-rarefied     | unknown Clostridiales [meta_mOTU_v2_6602]                   | old: YES-ENRICHED | new: NS           |
| DIFF        | Microbiome-Taxonomy-OTU-mOTU2-rarefied     | unknown Clostridiales [meta_mOTU_v2_5978]                   | old: NS           | new: YES-ENRICHED |
| DIFF        | Microbiome-Taxonomy-OTU-mOTU2-rarefied     | Anaerotruncus colihominis [ref_mOTU_v2_0884]                | old: YES-ENRICHED | new: NS           |
| DIFF        | Microbiome-Taxonomy-OTU-mOTU2-rarefied     | Clostridium asparagiforme [ref_mOTU_v2_4394]                | old: YES-ENRICHED | new: NS           |
| DIFF        | Microbiome-Taxonomy-OTU-mOTU2-rarefied     | unknown Clostridiales [meta_mOTU_v2_6777]                   | old: NS           | new: YES-ENRICHED |
| DIFF        | Microbiome-Taxonomy-OTU-mOTU2-rarefied     | Dialister invisus [ref_mOTU_v2_4598]                        | old: YES-DEPLETED | new: NS           |
| DIFF        | Microbiome-Taxonomy-OTU-mOTU2-rarefied     | Dialister invisus [ref_mOTU_v2_4598]                        | old: YES-ENRICHED | new: NS           |
| DIFF        | Microbiome-Taxonomy-OTU-mOTU2-rarefied     | Coprococcus comes [ref_mOTU_v2_4313]                        | old: YES-DEPLETED | new: NS           |
| DIFF        | Microbiome-Taxonomy-OTU-mOTU2-rarefied     | Coprococcus comes [ref_mOTU_v2_4313]                        | old: YES-ENRICHED | new: NS           |
| DIFF        | Microbiome-Taxonomy-Phylum-mOTU2-rarefied  | Bacteria phylum incertae sedis                              | old: YES-DEPLETED | new: NS           |
| DIFF        | Microbiome-Taxonomy-Species-16S            | Bacteria;Bacteroidetes;Bacteroidia;Bacteroidales;Bacteroid  | old: YES-ENRICHED | new: NS           |
| DIFF        | Microbiome-Taxonomy-Species-16S            | Bacteria;Bacteroidetes;Bacteroidia;Bacteroidales;Bacteroid  | old: YES-DEPLETED | new: NS           |
| DIFF        | Microbiome-Taxonomy-Species-16S            | Bacteria;Firmicutes;Erysipelotrichia;Erysipelotrichales;Ery | old: YES-ENRICHED | new: NS           |
| DIFF        | Microbiome-Taxonomy-Species-mOTU2-rarefied | Anaerotruncus colihominis                                   | old: YES-ENRICHED | new: NS           |
| DIFF        | Microbiome-Taxonomy-Species-mOTU2-rarefied | Bacteroides sp. _C fragilis_ovatus_                         | old: NS           | new: YES-ENRICHED |
| DIFF        | Microbiome-Taxonomy-Species-mOTU2-rarefied | Bacteroides sp. _C fragilis_ovatus_                         | old: NS           | new: YES-DEPLETED |
| DIFF        | Microbiome-Taxonomy-Species-mOTU2-rarefied | Oscillibacter sp. ER4                                       | old: YES-DEPLETED | new: NS           |
| DIFF        | Microbiome-Taxonomy-Species-mOTU2-rarefied | Oscillibacter sp. ER4                                       | old: YES-ENRICHED | new: NS           |
| DIFF        | Microbiome-Taxonomy-Species-mOTU2-rarefied | Coprococcus comes                                           | old: YES-DEPLETED | new: NS           |
| DIFF        | Microbiome-Taxonomy-Species-mOTU2-rarefied | Coprococcus comes                                           | old: YES-ENRICHED | new: NS           |
| DIFF        | Microbiome-Taxonomy-Species-mOTU2-rarefied | _Clostridium_asparagiforme                                  | old: YES-ENRICHED | new: NS           |
| SAME        | Host-Clinical                              | pulse                                                       | old: NS           | new: NS           |
| SAME        | Host-Clinical                              | pulse                                                       | old: NS           | new: NS           |
| SAME        | Host-Clinical                              | pulse                                                       | old: YES-DEPLETED | new: YES-DEPLETED |
| SAME        | Host-Clinical                              | MAD                                                         | old: NS           | new: NS           |
| SAME        | Host-Clinical                              | MAD                                                         | old: NS           | new: NS           |
| SAME        | Host-Clinical                              | MAD                                                         | old: YES-DEPLETED | new: YES-DEPLETED |
| SAME        | Host-Clinical                              | RR_syst_mobilograph                                         | old: NS           | new: NS           |
| SAME        | Host-Clinical                              | RR_syst_mobilograph                                         | old: NS           | new: NS           |
| SAME        | Host-Clinical                              | RR_syst_mobilograph                                         | old: YES-DEPLETED | new: YES-DEPLETED |
| SAME        | Host-Clinical                              | BP_sphygm_syst                                              | old: YES-DEPLETED | new: YES-DEPLETED |
| SAME        | Host-Clinical                              | BP_sphygm_syst                                              | old: YES-ENRICHED | new: YES-ENRICHED |
| SAME        | Host-Clinical                              | BP_sphygm_syst                                              | old: NS           | new: NS           |
| SAME        | Host-Clinical                              | eGFR                                                        | old: NS           | new: NS           |
| SAME        | Host-Clinical                              | eGFR                                                        | old: NS           | new: NS           |
| SAME        | Host-Clinical                              | IGF                                                         | old: NS           | new: NS           |
| SAME        | Host-Clinical                              | IGF                                                         | old: YES-ENRICHED | new: YES-ENRICHED |
| SAME        | Host-Clinical                              | IGF                                                         | old: NS           | new: NS           |
| SAME        | Host-Clinical                              | HbA1C                                                       | old: YES-DEPLETED | new: YES-DEPLETED |
| SAME        | Host-Clinical                              | HbA1C                                                       | old: YES-ENRICHED | new: YES-ENRICHED |
| SAME        | Host-Clinical                              | HbA1C                                                       | old: NS           | new: NS           |
| SAME        | Host-Clinical                              | HbA1C_IFCC                                                  | old: YES-DEPLETED | new: YES-DEPLETED |
| SAME        | Host-Clinical                              | HbA1C_IFCC                                                  | old: YES-ENRICHED | new: YES-ENRICHED |
| SAME        | Host-Clinical                              | HbA1C_IFCC                                                  | old: NS           | new: NS           |
| SAME        | Host-Clinical                              | WHR                                                         | old: YES-DEPLETED | new: YES-DEPLETED |
| SAME        | Host-Clinical                              | WHR                                                         | old: NS           | new: NS           |
| SAME        | Host-Clinical                              | WHR                                                         | old: YES-DEPLETED | new: YES-DEPLETED |
| SAME        | Host-Clinical                              | z_Systol                                                    | old: NS           | new: NS           |
| SAME        | Host-Clinical                              | z_Systol                                                    | old: NS           | new: NS           |
| SAME        | Host-Clinical                              | z_Systol                                                    | old: YES-DEPLETED | new: YES-DEPLETED |

Table S4

| Concordance | Space         | Feature                                         | Status, BMI-naive | Status, BMI-aware |
|-------------|---------------|-------------------------------------------------|-------------------|-------------------|
| SAME        | Host-Clinical | z_Diastol                                       | old: NS           | new: NS           |
| SAME        | Host-Clinical | z_Diastol                                       | old: NS           | new: NS           |
| SAME        | Host-Clinical | z_Diastol                                       | old: YES-DEPLETED | new: YES-DEPLETED |
| SAME        | Host-Clinical | pulse_pressure                                  | old: NS           | new: NS           |
| SAME        | Host-Clinical | pulse_pressure                                  | old: NS           | new: NS           |
| SAME        | Host-Clinical | pulse_pressure                                  | old: YES-DEPLETED | new: YES-DEPLETED |
| SAME        | Host-Clinical | waist_circumference                             | old: YES-DEPLETED | new: YES-DEPLETED |
| SAME        | Host-Clinical | waist_circumference                             | old: YES-DEPLETED | new: YES-DEPLETED |
| SAME        | Host-Clinical | waist_circumference                             | old: YES-DEPLETED | new: YES-DEPLETED |
| SAME        | Host-Clinical | BP_sphygm_diast                                 | old: YES-DEPLETED | new: YES-DEPLETED |
| SAME        | Host-Clinical | BP_sphygm_diast                                 | old: YES-ENRICHED | new: YES-ENRICHED |
| SAME        | Host-Clinical | BP_sphygm_diast                                 | old: NS           | new: NS           |
| SAME        | Host-Clinical | HMV                                             | old: NS           | new: NS           |
| SAME        | Host-Clinical | HMV                                             | old: NS           | new: NS           |
| SAME        | Host-Clinical | HMV                                             | old: YES-DEPLETED | new: YES-DEPLETED |
| SAME        | Host-Clinical | body_fat_ratio                                  | old: YES-ENRICHED | new: YES-ENRICHED |
| SAME        | Host-Clinical | body_fat_ratio                                  | old: YES-DEPLETED | new: YES-DEPLETED |
| SAME        | Host-Clinical | body_fat_ratio                                  | old: YES-DEPLETED | new: YES-DEPLETED |
| SAME        | Host-Clinical | insulin                                         | old: YES-DEPLETED | new: YES-DEPLETED |
| SAME        | Host-Clinical | insulin                                         | old: YES-ENRICHED | new: YES-ENRICHED |
| SAME        | Host-Clinical | insulin                                         | old: NS           | new: NS           |
| SAME        | Host-Clinical | plasma_glucose                                  | old: YES-DEPLETED | new: YES-DEPLETED |
| SAME        | Host-Clinical | plasma_glucose                                  | old: YES-ENRICHED | new: YES-ENRICHED |
| SAME        | Host-Clinical | plasma_glucose                                  | old: NS           | new: NS           |
| SAME        | Host-Clinical | urate                                           | old: YES-ENRICHED | new: YES-ENRICHED |
| SAME        | Host-Clinical | urate                                           | old: YES-DEPLETED | new: YES-DEPLETED |
| SAME        | Host-Clinical | urate                                           | old: NS           | new: NS           |
| SAME        | Host-Clinical | HOMA                                            | old: YES-DEPLETED | new: YES-DEPLETED |
| SAME        | Host-Clinical | HOMA                                            | old: YES-ENRICHED | new: YES-ENRICHED |
| SAME        | Host-Clinical | HOMA                                            | old: NS           | new: NS           |
| SAME        | Host-Clinical | hip_circumference                               | old: YES-DEPLETED | new: YES-DEPLETED |
| SAME        | Host-Clinical | hip_circumference                               | old: YES-DEPLETED | new: YES-DEPLETED |
| SAME        | Host-Clinical | hip_circumference                               | old: YES-DEPLETED | new: YES-DEPLETED |
| SAME        | Host-Clinical | triglycerol                                     | old: YES-DEPLETED | new: YES-DEPLETED |
| SAME        | Host-Clinical | triglycerol                                     | old: YES-ENRICHED | new: YES-ENRICHED |
| SAME        | Host-Clinical | triglycerol                                     | old: NS           | new: NS           |
| SAME        | Host-Clinical | weight                                          | old: NS           | new: NS           |
| SAME        | Immunome      | 7_IL17a-IL22-CD4+CD3+ /ul                       | old: YES-DEPLETED | new: YES-DEPLETED |
| SAME        | Immunome      | 7_IL17a-IL22-CD4+CD3+ /ul                       | old: YES-ENRICHED | new: YES-ENRICHED |
| SAME        | Immunome      | 7_IL17a-IL22-CD4+CD3+ /ul                       | old: NS           | new: NS           |
| SAME        | Immunome      | 5_CD24-CD45RO+CD25+CD4+CD8-CD3+ /ul             | old: YES-DEPLETED | new: YES-DEPLETED |
| SAME        | Immunome      | 5_CD24-CD45RO+CD25+CD4+CD8-CD3+ /ul             | old: NS           | new: NS           |
| SAME        | Immunome      | 5_CD24-CD45RO+CD25+CD4+CD8-CD3+ /ul             | old: NS           | new: NS           |
| SAME        | Immunome      | 6_CD25+CD4+ /ul2                                | old: YES-DEPLETED | new: YES-DEPLETED |
| SAME        | Immunome      | 6_CD25+CD4+ /ul2                                | old: YES-ENRICHED | new: YES-ENRICHED |
| SAME        | Immunome      | 6_CD25+CD4+ /ul2                                | old: YES-DEPLETED | new: YES-DEPLETED |
| SAME        | Immunome      | 5_CD24-CD45RO+CD25-CD4+ % of CD4high CD8-       | old: NS           | new: NS           |
| SAME        | Immunome      | 5_CD24-CD45RO+CD25-CD4+ % of CD4high CD8-       | old: YES-DEPLETED | new: YES-DEPLETED |
| SAME        | Immunome      | 5_CD24-CD45RO+CD25-CD4+ % of CD4high CD8-       | old: YES-DEPLETED | new: YES-DEPLETED |
| SAME        | Immunome      | 3_CD14low CD16+ % of HLA-DR+ CD16+/HLA-DR- CD1  | old: YES-ENRICHED | new: YES-ENRICHED |
| SAME        | Immunome      | 3_CD14low CD16+ % of HLA-DR+ CD16+/HLA-DR- CD1  | old: YES-DEPLETED | new: YES-DEPLETED |
| SAME        | Immunome      | 3_CD14low CD16+ % of HLA-DR+ CD16+/HLA-DR- CD1  | old: NS           | new: NS           |
| SAME        | Immunome      | 1_CD4+ CD8- CD3+ /ul                            | old: YES-DEPLETED | new: YES-DEPLETED |
| SAME        | Immunome      | 1_CD4+ CD8- CD3+ /ul                            | old: YES-ENRICHED | new: YES-ENRICHED |
| SAME        | Immunome      | 1_CD4+ CD8- CD3+ /ul                            | old: NS           | new: NS           |
| SAME        | Immunome      | 3_CD123+ CD14- CD16- HLA-DR+ % of CD4dim/-      | old: YES-ENRICHED | new: YES-ENRICHED |
| SAME        | Immunome      | 3_CD123+ CD14- CD16- HLA-DR+ % of CD4dim/-      | old: NS           | new: NS           |
| SAME        | Immunome      | 3_CD123+ CD14- CD16- HLA-DR+ % of CD4dim/-      | old: NS           | new: NS           |
| SAME        | Immunome      | 3_CD14low CD16+ HLA-DR+ CD16+/HLA-DR- CD16- /ul | old: NS           | new: NS           |
| SAME        | Immunome      | 3_CD14low CD16+ HLA-DR+ CD16+/HLA-DR- CD16- /ul | old: YES-DEPLETED | new: YES-DEPLETED |
| SAME        | Immunome      | 3_CD14low CD16+ HLA-DR+ CD16+/HLA-DR- CD16- /ul | old: NS           | new: NS           |
| SAME        | Immunome      | 5_CD24-CD45RO- CD25- CD4+ CD8- CD3+ /ul         | old: YES-DEPLETED | new: YES-DEPLETED |
| SAME        | Immunome      | 5_CD24-CD45RO- CD25- CD4+ CD8- CD3+ /ul         | old: YES-ENRICHED | new: YES-ENRICHED |
| SAME        | Immunome      | 5_CD24-CD45RO- CD25- CD4+ CD8- CD3+ /ul         | old: NS           | new: NS           |
| SAME        | Immunome      | 5_CD24-CD45RO+CD25+CD4+ % of CD4high CD8-       | old: NS           | new: NS           |
| SAME        | Immunome      | 5_CD24-CD45RO+CD25+CD4+ % of CD4high CD8-       | old: NS           | new: NS           |
| SAME        | Immunome      | 3_CD14hi CD16- % of HLA-DR+ CD16+/HLA-DR- CD16  | old: YES-ENRICHED | new: YES-ENRICHED |
| SAME        | Immunome      | 3_CD14hi CD16- % of HLA-DR+ CD16+/HLA-DR- CD16  | old: YES-DEPLETED | new: YES-DEPLETED |
| SAME        | Immunome      | 3_CD14hi CD16- % of HLA-DR+ CD16+/HLA-DR- CD16  | old: NS           | new: NS           |
| SAME        | Immunome      | 1_CD19+ % of PBMCs                              | old: YES-DEPLETED | new: YES-DEPLETED |
| SAME        | Immunome      | 1_CD19+ % of PBMCs                              | old: YES-ENRICHED | new: YES-ENRICHED |
| SAME        | Immunome      | 1_CD19+ % of PBMCs                              | old: NS           | new: NS           |
| SAME        | Immunome      | 5_CD25-CD4+ % of CD4high cells                  | old: NS           | new: NS           |
| SAME        | Immunome      | 5_CD25-CD4+ % of CD4high cells                  | old: NS           | new: NS           |
| SAME        | Immunome      | 1_CD3+ % of PBMCs                               | old: YES-DEPLETED | new: YES-DEPLETED |
| SAME        | Immunome      | 1_CD3+ % of PBMCs                               | old: YES-ENRICHED | new: YES-ENRICHED |
| SAME        | Immunome      | 1_CD3+ % of PBMCs                               | old: NS           | new: NS           |
| SAME        | Immunome      | 9_IL17a-IFNg+ Va7.2+ CD161+ CD4- CD3+ /ul       | old: YES-DEPLETED | new: YES-DEPLETED |
| SAME        | Immunome      | 9_IL17a-IFNg+ Va7.2+ CD161+ CD4- CD3+ /ul       | old: NS           | new: NS           |
| SAME        | Immunome      | 9_IL17a-IFNg+ Va7.2+ CD161+ CD4- CD3+ /ul       | old: NS           | new: NS           |
| SAME        | Immunome      | 7_Helios-IFNg- CD4+ CD3+ /ul                    | old: YES-DEPLETED | new: YES-DEPLETED |
| SAME        | Immunome      | 7_Helios-IFNg- CD4+ CD3+ /ul                    | old: YES-ENRICHED | new: YES-ENRICHED |
| SAME        | Immunome      | 7_Helios-IFNg- CD4+ CD3+ /ul                    | old: NS           | new: NS           |
| SAME        | Immunome      | 9_IL17a-IFNg+ Va7.2+ CD161 % of CD3+            | old: YES-DEPLETED | new: YES-DEPLETED |
| SAME        | Immunome      | 9_IL17a-IFNg+ Va7.2+ CD161 % of CD3+            | old: NS           | new: NS           |
| SAME        | Immunome      | 9_IL17a-IFNg+ Va7.2+ CD161 % of CD3+            | old: NS           | new: NS           |
| SAME        | Immunome      | 8_TNFa+ IL-5+ IL-17- CD4+ CD3+ /ul              | old: YES-DEPLETED | new: YES-DEPLETED |
| SAME        | Immunome      | 8_TNFa+ IL-5+ IL-17- CD4+ CD3+ /ul              | old: YES-ENRICHED | new: YES-ENRICHED |
| SAME        | Immunome      | 8_TNFa+ IL-5+ IL-17- CD4+ CD3+ /ul              | old: NS           | new: NS           |
| SAME        | Immunome      | 2_CD39-CD31+ CD25high CD127low CD4+ /ul         | old: NS           | new: NS           |
| SAME        | Immunome      | 2_CD39-CD31+ CD25high CD127low CD4+ /ul         | old: NS           | new: NS           |
| SAME        | Immunome      | 8_IL-10+ IL-2- IL-17- CD4+ CD3+ /ul             | old: YES-DEPLETED | new: YES-DEPLETED |
| SAME        | Immunome      | 8_IL-10+ IL-2- IL-17- CD4+ CD3+ /ul             | old: YES-ENRICHED | new: YES-ENRICHED |
| SAME        | Immunome      | 8_IL-10+ IL-2- IL-17- CD4+ CD3+ /ul             | old: NS           | new: NS           |
| SAME        | Immunome      | 5_CD62L-CD45RO- % of CD8+ CD4-                  | old: YES-ENRICHED | new: YES-ENRICHED |
| SAME        | Immunome      | 5_CD62L-CD45RO- % of CD8+ CD4-                  | old: NS           | new: NS           |
| SAME        | Immunome      | 5_CD62L-CD45RO- % of CD8+ CD4-                  | old: NS           | new: NS           |

Table S4

| Concordance | Space  | Feature                                                    | Status, BMI-naive | Status, BMI-aware |
|-------------|--------|------------------------------------------------------------|-------------------|-------------------|
| SAME        | Immune | 4_CD56dim CD16- % of CD3-                                  | old: YES-ENRICHED | new: YES-ENRICHED |
| SAME        | Immune | 4_CD56dim CD16- % of CD3-                                  | old: YES-DEPLETED | new: YES-DEPLETED |
| SAME        | Immune | 4_CD56dim CD16- % of CD3-                                  | old: NS           | new: NS           |
| SAME        | Immune | 8_GMCSF+ IL-2- IL-17- CD4+ CD3+ /ul                        | old: YES-DEPLETED | new: YES-DEPLETED |
| SAME        | Immune | 8_GMCSF+ IL-2- IL-17- CD4+ CD3+ /ul                        | old: YES-ENRICHED | new: YES-ENRICHED |
| SAME        | Immune | 8_GMCSF+ IL-2- IL-17- CD4+ CD3+ /ul                        | old: NS           | new: NS           |
| SAME        | Immune | 3_CD14- CD16- HLA-DR+ % of CD4dim/-                        | old: YES-DEPLETED | new: YES-DEPLETED |
| SAME        | Immune | 3_CD14- CD16- HLA-DR+ % of CD4dim/-                        | old: YES-ENRICHED | new: YES-ENRICHED |
| SAME        | Immune | 3_CD14- CD16- HLA-DR+ % of CD4dim/-                        | old: NS           | new: NS           |
| SAME        | Immune | 3_CD14low CD16+ HLA-DR+ CD16+ /HLA-DR- CD16- % of CD4dim/- | old: YES-ENRICHED | new: YES-ENRICHED |
| SAME        | Immune | 3_CD14low CD16+ HLA-DR+ CD16+ /HLA-DR- CD16- % of CD4dim/- | old: YES-DEPLETED | new: YES-DEPLETED |
| SAME        | Immune | 3_CD14low CD16+ HLA-DR+ CD16+ /HLA-DR- CD16- % of CD4dim/- | old: NS           | new: NS           |
| SAME        | Immune | 7_Foxp3+ Helios- CD4+ CD3+ /ul                             | old: YES-DEPLETED | new: YES-DEPLETED |
| SAME        | Immune | 7_Foxp3+ Helios- CD4+ CD3+ /ul                             | old: YES-ENRICHED | new: YES-ENRICHED |
| SAME        | Immune | 7_Foxp3+ Helios- CD4+ CD3+ /ul                             | old: NS           | new: NS           |
| SAME        | Immune | 8_IL-10- IL-2+ IL-17- CD4+ CD3+ /ul                        | old: YES-DEPLETED | new: YES-DEPLETED |
| SAME        | Immune | 8_IL-10- IL-2+ IL-17- CD4+ CD3+ /ul                        | old: YES-ENRICHED | new: YES-ENRICHED |
| SAME        | Immune | 8_IL-10- IL-2+ IL-17- CD4+ CD3+ /ul                        | old: NS           | new: NS           |
| SAME        | Immune | 1_CD4+ CD8- % of PBMCs                                     | old: YES-DEPLETED | new: YES-DEPLETED |
| SAME        | Immune | 1_CD4+ CD8- % of PBMCs                                     | old: YES-ENRICHED | new: YES-ENRICHED |
| SAME        | Immune | 1_CD4+ CD8- % of PBMCs                                     | old: NS           | new: NS           |
| SAME        | Immune | 8_TNFa- IL-2- IL-17+ CD4+ CD3+ /ul                         | old: NS           | new: NS           |
| SAME        | Immune | 8_TNFa- IL-2- IL-17+ CD4+ CD3+ /ul                         | old: YES-ENRICHED | new: YES-ENRICHED |
| SAME        | Immune | 8_TNFa- IL-2- IL-17+ CD4+ CD3+ /ul                         | old: NS           | new: NS           |
| SAME        | Immune | 8_TNFa- IL-2- IL-17- CD4+ CD3+ /ul                         | old: NS           | new: NS           |
| SAME        | Immune | 8_TNFa- IL-2- IL-17- CD4+ CD3+ /ul                         | old: YES-ENRICHED | new: YES-ENRICHED |
| SAME        | Immune | 8_TNFa- IL-2- IL-17- CD4+ CD3+ /ul                         | old: NS           | new: NS           |
| SAME        | Immune | 8_GMCSF- IL-2- IL-17+ CD4+ CD3+ /ul                        | old: YES-DEPLETED | new: YES-DEPLETED |
| SAME        | Immune | 8_GMCSF- IL-2- IL-17+ CD4+ CD3+ /ul                        | old: YES-ENRICHED | new: YES-ENRICHED |
| SAME        | Immune | 8_GMCSF- IL-2- IL-17+ CD4+ CD3+ /ul                        | old: NS           | new: NS           |
| SAME        | Immune | 8_TNFa- IL-5- IL-17- % of CD3+                             | old: NS           | new: NS           |
| SAME        | Immune | 8_TNFa- IL-5- IL-17- % of CD3+                             | old: NS           | new: NS           |
| SAME        | Immune | 8_TNFa- IL-5- IL-17- % of CD3+                             | old: NS           | new: NS           |
| SAME        | Immune | 3_CD11c+ CD14- CD16- HLA-DR+ CD4dim/- % of PBMCs           | old: NS           | new: NS           |
| SAME        | Immune | 3_CD11c+ CD14- CD16- HLA-DR+ CD4dim/- % of PBMCs           | old: NS           | new: NS           |
| SAME        | Immune | 4_TCRgd+ % of CD4- CD8- CD3+                               | old: YES-ENRICHED | new: YES-ENRICHED |
| SAME        | Immune | 4_TCRgd+ % of CD4- CD8- CD3+                               | old: YES-DEPLETED | new: YES-DEPLETED |
| SAME        | Immune | 4_TCRgd+ % of CD4- CD8- CD3+                               | old: NS           | new: NS           |
| SAME        | Immune | 7_Foxp3+ Ki67- CD4+ CD3+ /ul                               | old: NS           | new: NS           |
| SAME        | Immune | 7_Foxp3+ Ki67- CD4+ CD3+ /ul                               | old: NS           | new: NS           |
| SAME        | Immune | 7_Foxp3+ Ki67- CD4+ CD3+ /ul                               | old: NS           | new: NS           |
| SAME        | Immune | 5_CD24- CD45RO+ CD8+ CD4- CD3+ /ul                         | old: YES-DEPLETED | new: YES-DEPLETED |
| SAME        | Immune | 5_CD24- CD45RO+ CD8+ CD4- CD3+ /ul                         | old: NS           | new: NS           |
| SAME        | Immune | 5_CD24- CD45RO+ CD8+ CD4- CD3+ /ul                         | old: NS           | new: NS           |
| SAME        | Immune | 6_CXCR3- CD25+ CD4+ /ul                                    | old: YES-DEPLETED | new: YES-DEPLETED |
| SAME        | Immune | 6_CXCR3- CD25+ CD4+ /ul                                    | old: YES-ENRICHED | new: YES-ENRICHED |
| SAME        | Immune | 6_CXCR3- CD25+ CD4+ /ul                                    | old: NS           | new: NS           |
| SAME        | Immune | 5_CD62L- CD45RO- % of CD25- CD4+ CD4high CD8-              | old: YES-ENRICHED | new: YES-ENRICHED |
| SAME        | Immune | 5_CD62L- CD45RO- % of CD25- CD4+ CD4high CD8-              | old: NS           | new: NS           |
| SAME        | Immune | 5_CD62L- CD45RO- % of CD25- CD4+ CD4high CD8-              | old: NS           | new: NS           |
| SAME        | Immune | 3_CD11c+ % of CD14- CD16- HLA-DR+ CD4dim/-                 | old: YES-ENRICHED | new: YES-ENRICHED |
| SAME        | Immune | 3_CD11c+ % of CD14- CD16- HLA-DR+ CD4dim/-                 | old: NS           | new: NS           |
| SAME        | Immune | 3_CD11c+ % of CD14- CD16- HLA-DR+ CD4dim/-                 | old: NS           | new: NS           |
| SAME        | Immune | 5_CD62L- CD45RO- CD25+ CD4+ CD8- CD3+ /ul                  | old: YES-DEPLETED | new: YES-DEPLETED |
| SAME        | Immune | 5_CD62L- CD45RO- CD25+ CD4+ CD8- CD3+ /ul                  | old: YES-ENRICHED | new: YES-ENRICHED |
| SAME        | Immune | 5_CD62L- CD45RO- CD25+ CD4+ CD8- CD3+ /ul                  | old: NS           | new: NS           |
| SAME        | Immune | 9_IL2- TNFa+ Va7.2+ CD161+ CD4- CD3+ /ul                   | old: YES-DEPLETED | new: YES-DEPLETED |
| SAME        | Immune | 9_IL2- TNFa+ Va7.2+ CD161+ CD4- CD3+ /ul                   | old: NS           | new: NS           |
| SAME        | Immune | 9_IL2- TNFa+ Va7.2+ CD161+ CD4- CD3+ /ul                   | old: NS           | new: NS           |
| SAME        | Immune | 5_CD62L- CD45RO- CD25- CD4+ % of CD4high CD8-              | old: YES-ENRICHED | new: YES-ENRICHED |
| SAME        | Immune | 5_CD62L- CD45RO- CD25- CD4+ % of CD4high CD8-              | old: NS           | new: NS           |
| SAME        | Immune | 5_CD62L- CD45RO- CD25- CD4+ % of CD4high CD8-              | old: NS           | new: NS           |
| SAME        | Immune | 5_CD4_Teff/Treg                                            | old: YES-ENRICHED | new: YES-ENRICHED |
| SAME        | Immune | 5_CD4_Teff/Treg                                            | old: NS           | new: NS           |
| SAME        | Immune | 5_CD4_Teff/Treg                                            | old: YES-ENRICHED | new: YES-ENRICHED |
| SAME        | Immune | 8_TNFa- IL-5- IL-17- CD4+ CD3+ /ul                         | old: NS           | new: NS           |
| SAME        | Immune | 8_TNFa- IL-5- IL-17- CD4+ CD3+ /ul                         | old: YES-ENRICHED | new: YES-ENRICHED |
| SAME        | Immune | 8_TNFa- IL-5- IL-17- CD4+ CD3+ /ul                         | old: NS           | new: NS           |
| SAME        | Immune | 8_TNFa+ IL-5- IL-17- CD4+ CD3+ /ul                         | old: YES-DEPLETED | new: YES-DEPLETED |
| SAME        | Immune | 8_TNFa+ IL-5- IL-17- CD4+ CD3+ /ul                         | old: NS           | new: NS           |
| SAME        | Immune | 8_TNFa+ IL-5- IL-17- CD4+ CD3+ /ul                         | old: NS           | new: NS           |
| SAME        | Immune | 6_CD25+ % of CD4+                                          | old: NS           | new: NS           |
| SAME        | Immune | 8_TNFa- IL-2- IL-17- % of CD3+                             | old: NS           | new: NS           |
| SAME        | Immune | 8_TNFa- IL-2- IL-17- % of CD3+                             | old: NS           | new: NS           |
| SAME        | Immune | 5_CD24+ CD45RO+ % of CD8+ CD4-                             | old: NS           | new: NS           |
| SAME        | Immune | 5_CD24+ CD45RO+ % of CD8+ CD4-                             | old: YES-ENRICHED | new: YES-ENRICHED |
| SAME        | Immune | 5_CD24+ CD45RO+ % of CD8+ CD4-                             | old: YES-ENRICHED | new: YES-ENRICHED |
| SAME        | Immune | 3_CD14- CD16- % of HLA-DR+ CD4dim/-                        | old: YES-DEPLETED | new: YES-DEPLETED |
| SAME        | Immune | 3_CD14- CD16- % of HLA-DR+ CD4dim/-                        | old: YES-ENRICHED | new: YES-ENRICHED |
| SAME        | Immune | 3_CD14- CD16- % of HLA-DR+ CD4dim/-                        | old: NS           | new: NS           |
| SAME        | Immune | 8_IL-10+ IL-2+ IL-17- CD4+ CD3+ /ul                        | old: YES-DEPLETED | new: YES-DEPLETED |
| SAME        | Immune | 8_IL-10+ IL-2+ IL-17- CD4+ CD3+ /ul                        | old: YES-ENRICHED | new: YES-ENRICHED |
| SAME        | Immune | 8_IL-10+ IL-2+ IL-17- CD4+ CD3+ /ul                        | old: NS           | new: NS           |
| SAME        | Immune | 5_CD62L+ CD45RO- CD8+ CD4- CD3+ /ul                        | old: YES-DEPLETED | new: YES-DEPLETED |
| SAME        | Immune | 5_CD62L+ CD45RO- CD8+ CD4- CD3+ /ul                        | old: NS           | new: NS           |
| SAME        | Immune | 5_CD62L+ CD45RO- CD8+ CD4- CD3+ /ul                        | old: NS           | new: NS           |
| SAME        | Immune | 6_CD161- CCR6- CXCR3- CD25+ CD4+ /ul                       | old: YES-DEPLETED | new: YES-DEPLETED |
| SAME        | Immune | 6_CD161- CCR6- CXCR3- CD25+ CD4+ /ul                       | old: YES-ENRICHED | new: YES-ENRICHED |
| SAME        | Immune | 6_CD161- CCR6- CXCR3- CD25+ CD4+ /ul                       | old: NS           | new: NS           |
| SAME        | Immune | 7_Helios- Ki67- CD4+ CD3+ /ul                              | old: YES-DEPLETED | new: YES-DEPLETED |
| SAME        | Immune | 7_Helios- Ki67- CD4+ CD3+ /ul                              | old: YES-ENRICHED | new: YES-ENRICHED |
| SAME        | Immune | 7_Helios- Ki67- CD4+ CD3+ /ul                              | old: NS           | new: NS           |
| SAME        | Immune | 7_IL17a- Ki67- CD4+ CD3+ /ul                               | old: YES-DEPLETED | new: YES-DEPLETED |
| SAME        | Immune | 7_IL17a- Ki67- CD4+ CD3+ /ul                               | old: YES-ENRICHED | new: YES-ENRICHED |
| SAME        | Immune | 7_IL17a- Ki67- CD4+ CD3+ /ul                               | old: NS           | new: NS           |
| SAME        | Immune | 8_TNFa+ IL-5+ IL-17+ CD4+ CD3+ /ul                         | old: YES-DEPLETED | new: YES-DEPLETED |
| SAME        | Immune | 8_TNFa+ IL-5+ IL-17+ CD4+ CD3+ /ul                         | old: YES-ENRICHED | new: YES-ENRICHED |
| SAME        | Immune | 8_TNFa+ IL-5+ IL-17+ CD4+ CD3+ /ul                         | old: NS           | new: NS           |
| SAME        | Immune | 7_Helios- IFNg- % of CD3+                                  | old: NS           | new: NS           |

Table S4

| Concordance | Space    | Feature                                         | Status, BMI-naive | Status, BMI-aware |
|-------------|----------|-------------------------------------------------|-------------------|-------------------|
| SAME        | Immunome | 7_Helios- IFNg- % of CD3+                       | old: YES-ENRICHED | new: YES-ENRICHED |
| SAME        | Immunome | 7_Helios- IFNg- % of CD3+                       | old: NS           | new: NS           |
| SAME        | Immunome | 7_Foxp3- Helios- CD4+ CD3+ /ul                  | old: YES-DEPLETED | new: YES-DEPLETED |
| SAME        | Immunome | 7_Foxp3- Helios- CD4+ CD3+ /ul                  | old: YES-ENRICHED | new: YES-ENRICHED |
| SAME        | Immunome | 7_Foxp3- Helios- CD4+ CD3+ /ul                  | old: NS           | new: NS           |
| SAME        | Immunome | 8_TNFa+ IL-5- IL-17- % of CD3+                  | old: YES-DEPLETED | new: YES-DEPLETED |
| SAME        | Immunome | 8_TNFa+ IL-5- IL-17- % of CD3+                  | old: NS           | new: NS           |
| SAME        | Immunome | 8_TNFa+ IL-5- IL-17- % of CD3+                  | old: NS           | new: NS           |
| SAME        | Immunome | 5_CD62L- CD45RO+ CD25+ CD4+ CD8- CD3+ /ul       | old: YES-DEPLETED | new: YES-DEPLETED |
| SAME        | Immunome | 5_CD62L- CD45RO+ CD25+ CD4+ CD8- CD3+ /ul       | old: NS           | new: NS           |
| SAME        | Immunome | 5_CD62L- CD45RO+ CD25+ CD4+ CD8- CD3+ /ul       | old: NS           | new: NS           |
| SAME        | Immunome | 7_Helios+ IFNg- % of CD3+                       | old: YES-DEPLETED | new: YES-DEPLETED |
| SAME        | Immunome | 7_Helios+ IFNg- % of CD3+                       | old: YES-DEPLETED | new: YES-DEPLETED |
| SAME        | Immunome | 7_Helios+ Ki67- % of CD3+                       | old: NS           | new: NS           |
| SAME        | Immunome | 7_Helios+ Ki67- % of CD3+                       | old: YES-DEPLETED | new: YES-DEPLETED |
| SAME        | Immunome | 7_Helios+ Ki67- % of CD3+                       | old: NS           | new: NS           |
| SAME        | Immunome | 7_Foxp3- Ki67- CD4+ CD3+ /ul                    | old: YES-DEPLETED | new: YES-DEPLETED |
| SAME        | Immunome | 7_Foxp3- Ki67- CD4+ CD3+ /ul                    | old: YES-ENRICHED | new: YES-ENRICHED |
| SAME        | Immunome | 7_Foxp3- Ki67- CD4+ CD3+ /ul                    | old: NS           | new: NS           |
| SAME        | Immunome | 2_CD39+ CD31- CD25high CD127low CD4+ /ul        | old: YES-DEPLETED | new: YES-DEPLETED |
| SAME        | Immunome | 2_CD39+ CD31- CD25high CD127low CD4+ /ul        | old: NS           | new: NS           |
| SAME        | Immunome | 2_CD39+ CD31- CD25high CD127low CD4+ /ul        | old: NS           | new: NS           |
| SAME        | Immunome | 5_CD24- CD45RO- CD25+ CD4+ CD8- CD3+ /ul        | old: YES-DEPLETED | new: YES-DEPLETED |
| SAME        | Immunome | 5_CD24- CD45RO- CD25+ CD4+ CD8- CD3+ /ul        | old: YES-ENRICHED | new: YES-ENRICHED |
| SAME        | Immunome | 5_CD24- CD45RO- CD25+ CD4+ CD8- CD3+ /ul        | old: NS           | new: NS           |
| SAME        | Immunome | 9_IFNg+ TNFVa- Va7.2+ CD161+ CD4- CD3+ /ul      | old: YES-DEPLETED | new: YES-DEPLETED |
| SAME        | Immunome | 9_IFNg+ TNFVa- Va7.2+ CD161+ CD4- CD3+ /ul      | old: NS           | new: NS           |
| SAME        | Immunome | 9_IFNg+ TNFVa- Va7.2+ CD161+ CD4- CD3+ /ul      | old: NS           | new: NS           |
| SAME        | Immunome | 6_CD27- % of CD25- CD4+                         | old: NS           | new: NS           |
| SAME        | Immunome | 6_CD27- % of CD25- CD4+                         | old: YES-DEPLETED | new: YES-DEPLETED |
| SAME        | Immunome | 6_CD27- % of CD25- CD4+                         | old: NS           | new: NS           |
| SAME        | Immunome | 8_TNFa- IL-2+ IL-17- CD4+ CD3+ /ul              | old: YES-DEPLETED | new: YES-DEPLETED |
| SAME        | Immunome | 8_TNFa- IL-2+ IL-17- CD4+ CD3+ /ul              | old: YES-ENRICHED | new: YES-ENRICHED |
| SAME        | Immunome | 8_TNFa- IL-2+ IL-17- CD4+ CD3+ /ul              | old: NS           | new: NS           |
| SAME        | Immunome | 8_TNFa+ IL-2- IL-17+ CD4+ CD3+ /ul              | old: YES-DEPLETED | new: YES-DEPLETED |
| SAME        | Immunome | 8_TNFa+ IL-2- IL-17+ CD4+ CD3+ /ul              | old: YES-ENRICHED | new: YES-ENRICHED |
| SAME        | Immunome | 8_TNFa+ IL-2- IL-17+ CD4+ CD3+ /ul              | old: NS           | new: NS           |
| SAME        | Immunome | Monocytes % of viable                           | old: YES-ENRICHED | new: YES-ENRICHED |
| SAME        | Immunome | Monocytes % of viable                           | old: YES-DEPLETED | new: YES-DEPLETED |
| SAME        | Immunome | Monocytes % of viable                           | old: NS           | new: NS           |
| SAME        | Immunome | 2_CD25high CD127low CD4+ /ul                    | old: YES-DEPLETED | new: YES-DEPLETED |
| SAME        | Immunome | 2_CD25high CD127low CD4+ /ul                    | old: NS           | new: NS           |
| SAME        | Immunome | 2_CD25high CD127low CD4+ /ul                    | old: NS           | new: NS           |
| SAME        | Immunome | 6_CD25- CD4+ /ul                                | old: YES-DEPLETED | new: YES-DEPLETED |
| SAME        | Immunome | 6_CD25- CD4+ /ul                                | old: YES-ENRICHED | new: YES-ENRICHED |
| SAME        | Immunome | 6_CD25- CD4+ /ul                                | old: NS           | new: NS           |
| SAME        | Immunome | 5_CD25+ CD4+% of CD4high                        | old: YES-DEPLETED | new: YES-DEPLETED |
| SAME        | Immunome | 5_CD25+ CD4+% of CD4high                        | old: NS           | new: NS           |
| SAME        | Immunome | 5_CD25+ CD4+% of CD4high                        | old: NS           | new: NS           |
| SAME        | Immunome | 8_TNFa- IL-2- % of IL-17- CD3+                  | old: NS           | new: NS           |
| SAME        | Immunome | 8_TNFa- IL-2- % of IL-17- CD3+                  | old: NS           | new: NS           |
| SAME        | Immunome | 6_CD27bright % of CD25- CD4+                    | old: NS           | new: NS           |
| SAME        | Immunome | 6_CD27bright % of CD25- CD4+                    | old: YES-ENRICHED | new: YES-ENRICHED |
| SAME        | Immunome | 6_CD27bright % of CD25- CD4+                    | old: NS           | new: NS           |
| SAME        | Immunome | 5_CD62L+ CD45RO- CD25- CD4+ CD8- CD3+ /ul       | old: YES-DEPLETED | new: YES-DEPLETED |
| SAME        | Immunome | 5_CD62L+ CD45RO- CD25- CD4+ CD8- CD3+ /ul       | old: YES-ENRICHED | new: YES-ENRICHED |
| SAME        | Immunome | 5_CD62L+ CD45RO- CD25- CD4+ CD8- CD3+ /ul       | old: NS           | new: NS           |
| SAME        | Immunome | 9_IL2+ TNFVa+ Va7.2+ CD161+ CD4- CD3+ /ul       | old: NS           | new: NS           |
| SAME        | Immunome | 9_IL2+ TNFVa+ Va7.2+ CD161+ CD4- CD3+ /ul       | old: NS           | new: NS           |
| SAME        | Immunome | 8_TNFa+ IL-2- IL-17- CD4+ CD3+ /ul              | old: YES-DEPLETED | new: YES-DEPLETED |
| SAME        | Immunome | 8_TNFa+ IL-2- IL-17- CD4+ CD3+ /ul              | old: YES-ENRICHED | new: YES-ENRICHED |
| SAME        | Immunome | 8_TNFa+ IL-2- IL-17- CD4+ CD3+ /ul              | old: NS           | new: NS           |
| SAME        | Immunome | 5_CD62L+ CD45RO+ CD25+ CD4+ CD8- CD3+ /ul       | old: YES-DEPLETED | new: YES-DEPLETED |
| SAME        | Immunome | 5_CD62L+ CD45RO+ CD25+ CD4+ CD8- CD3+ /ul       | old: YES-ENRICHED | new: YES-ENRICHED |
| SAME        | Immunome | 5_CD62L+ CD45RO+ CD25+ CD4+ CD8- CD3+ /ul       | old: YES-DEPLETED | new: YES-DEPLETED |
| SAME        | Immunome | 5_CD24- % of CD4high CD8dim                     | old: NS           | new: NS           |
| SAME        | Immunome | 5_CD24- % of CD4high CD8dim                     | old: YES-DEPLETED | new: YES-DEPLETED |
| SAME        | Immunome | 5_CD24- % of CD4high CD8dim                     | old: NS           | new: NS           |
| SAME        | Immunome | 8_TNFa+ IL-5+ % of IL-17- CD3+                  | old: YES-DEPLETED | new: YES-DEPLETED |
| SAME        | Immunome | 8_TNFa+ IL-5+ % of IL-17- CD3+                  | old: NS           | new: NS           |
| SAME        | Immunome | 8_TNFa+ IL-5+ % of IL-17- CD3+                  | old: NS           | new: NS           |
| SAME        | Immunome | 6_CD25+ CD4+ /ul                                | old: YES-DEPLETED | new: YES-DEPLETED |
| SAME        | Immunome | 6_CD25+ CD4+ /ul                                | old: YES-ENRICHED | new: YES-ENRICHED |
| SAME        | Immunome | 6_CD25+ CD4+ /ul                                | old: YES-DEPLETED | new: YES-DEPLETED |
| SAME        | Immunome | 5_CD24+ CD4high CD8dim % of CD4+ CD8            | old: NS           | new: NS           |
| SAME        | Immunome | 5_CD24+ CD4high CD8dim % of CD4+ CD8            | old: YES-ENRICHED | new: YES-ENRICHED |
| SAME        | Immunome | 5_CD24+ CD4high CD8dim % of CD4+ CD8            | old: NS           | new: NS           |
| SAME        | Immunome | 2_FoxP3+ CD31- CD25high CD127low CD4+ /ul       | old: YES-DEPLETED | new: YES-DEPLETED |
| SAME        | Immunome | 2_FoxP3+ CD31- CD25high CD127low CD4+ /ul       | old: NS           | new: NS           |
| SAME        | Immunome | 2_FoxP3+ CD31- CD25high CD127low CD4+ /ul       | old: NS           | new: NS           |
| SAME        | Immunome | 4_CD56 high CD16- % of CD56+ CD3-               | old: YES-ENRICHED | new: YES-ENRICHED |
| SAME        | Immunome | 4_CD56 high CD16- % of CD56+ CD3-               | old: YES-ENRICHED | new: YES-ENRICHED |
| SAME        | Immunome | 3_CD123+ CD14- CD16- HLA-DR+ CD4dim/- % of PBCI | old: YES-ENRICHED | new: YES-ENRICHED |
| SAME        | Immunome | 3_CD123+ CD14- CD16- HLA-DR+ CD4dim/- % of PBCI | old: YES-DEPLETED | new: YES-DEPLETED |
| SAME        | Immunome | 3_CD123+ CD14- CD16- HLA-DR+ CD4dim/- % of PBCI | old: YES-ENRICHED | new: YES-ENRICHED |
| SAME        | Immunome | 9_IFNg+ TNFVa+ Va7.2+ CD161+ CD4- CD3+ /ul      | old: YES-DEPLETED | new: YES-DEPLETED |
| SAME        | Immunome | 9_IFNg+ TNFVa+ Va7.2+ CD161+ CD4- CD3+ /ul      | old: NS           | new: NS           |
| SAME        | Immunome | 9_IFNg+ TNFVa+ Va7.2+ CD161+ CD4- CD3+ /ul      | old: NS           | new: NS           |
| SAME        | Immunome | 6_CD27- CD25- % of CD4+                         | old: YES-ENRICHED | new: YES-ENRICHED |
| SAME        | Immunome | 6_CD27- CD25- % of CD4+                         | old: YES-DEPLETED | new: YES-DEPLETED |
| SAME        | Immunome | 6_CD27- CD25- % of CD4+                         | old: NS           | new: NS           |
| SAME        | Immunome | 5_CD24+ CD45RO- % of CD8+ CD4-                  | old: NS           | new: NS           |
| SAME        | Immunome | 5_CD24+ CD45RO- % of CD8+ CD4-                  | old: YES-ENRICHED | new: YES-ENRICHED |
| SAME        | Immunome | 5_CD24+ CD45RO- % of CD8+ CD4-                  | old: NS           | new: NS           |
| SAME        | Immunome | 5_CD4+ CD25+% of total cells                    | old: YES-DEPLETED | new: YES-DEPLETED |

Table S4

| Concordance | Space  | Feature                                         | Status, BMI-naive | Status, BMI-aware |
|-------------|--------|-------------------------------------------------|-------------------|-------------------|
| SAME        | Immune | 5_CD4+ CD25+% of total cells                    | old: NS           | new: NS           |
| SAME        | Immune | 5_CD4+ CD25+% of total cells                    | old: NS           | new: NS           |
| SAME        | Immune | 7_Helios+ IFNg- CD4+ CD3+ /ul                   | old: NS           | new: NS           |
| SAME        | Immune | 7_Helios+ IFNg- CD4+ CD3+ /ul                   | old: YES-DEPLETED | new: YES-DEPLETED |
| SAME        | Immune | 7_Helios+ IFNg- CD4+ CD3+ /ul                   | old: NS           | new: NS           |
| SAME        | Immune | 5_CD4_Tem/Treg                                  | old: YES-ENRICHED | new: YES-ENRICHED |
| SAME        | Immune | 5_CD4_Tem/Treg                                  | old: NS           | new: NS           |
| SAME        | Immune | 5_CD4_Tem/Treg                                  | old: NS           | new: NS           |
| SAME        | Immune | 8_TNFa- IL-5+ IL-17- CD4+ CD3+ /ul              | old: YES-DEPLETED | new: YES-DEPLETED |
| SAME        | Immune | 8_TNFa- IL-5+ IL-17- CD4+ CD3+ /ul              | old: YES-ENRICHED | new: YES-ENRICHED |
| SAME        | Immune | 8_TNFa- IL-5+ IL-17- CD4+ CD3+ /ul              | old: NS           | new: NS           |
| SAME        | Immune | 5_CD24- CD45RO- % of CD8+ CD4-                  | old: NS           | new: NS           |
| SAME        | Immune | 5_CD24- CD45RO- % of CD8+ CD4-                  | old: NS           | new: NS           |
| SAME        | Immune | 6_CXCR3- CD25+ % of CD4+                        | old: YES-DEPLETED | new: YES-DEPLETED |
| SAME        | Immune | 6_CXCR3- CD25+ % of CD4+                        | old: NS           | new: NS           |
| SAME        | Immune | 6_CXCR3- CD25+ % of CD4+                        | old: YES-DEPLETED | new: YES-DEPLETED |
| SAME        | Immune | 6_CD27bright % of CD161+ CCR6+ CXCR3- CD25- CD4 | old: YES-DEPLETED | new: YES-DEPLETED |
| SAME        | Immune | 6_CD27bright % of CD161+ CCR6+ CXCR3- CD25- CD4 | old: YES-ENRICHED | new: YES-ENRICHED |
| SAME        | Immune | 6_CD27bright % of CD161+ CCR6+ CXCR3- CD25- CD4 | old: NS           | new: NS           |
| SAME        | Immune | 1_CD4- CD8- % of CD3+                           | old: YES-ENRICHED | new: YES-ENRICHED |
| SAME        | Immune | 1_CD4- CD8- % of CD3+                           | old: YES-DEPLETED | new: YES-DEPLETED |
| SAME        | Immune | 1_CD4- CD8- % of CD3+                           | old: NS           | new: NS           |
| SAME        | Immune | 8_TNFa+ IL-2+ IL-17- CD4+ CD3+ /ul              | old: YES-DEPLETED | new: YES-DEPLETED |
| SAME        | Immune | 8_TNFa+ IL-2+ IL-17- CD4+ CD3+ /ul              | old: NS           | new: NS           |
| SAME        | Immune | 8_TNFa+ IL-2+ IL-17- CD4+ CD3+ /ul              | old: NS           | new: NS           |
| SAME        | Immune | 5_CD24+ CD45RO- CD8+ CD4- CD3+ /ul              | old: YES-DEPLETED | new: YES-DEPLETED |
| SAME        | Immune | 5_CD24+ CD45RO- CD8+ CD4- CD3+ /ul              | old: YES-ENRICHED | new: YES-ENRICHED |
| SAME        | Immune | 5_CD24+ CD45RO- CD8+ CD4- CD3+ /ul              | old: NS           | new: NS           |
| SAME        | Immune | 8_TNFa+ IL-2- % of IL-17- CD3+                  | old: YES-DEPLETED | new: YES-DEPLETED |
| SAME        | Immune | 8_TNFa+ IL-2- % of IL-17- CD3+                  | old: NS           | new: NS           |
| SAME        | Immune | 8_TNFa+ IL-2- % of IL-17- CD3+                  | old: NS           | new: NS           |
| SAME        | Immune | 9_IFNg+ TNF+ Va7.2+ CD161 % of CD3+             | old: YES-DEPLETED | new: YES-DEPLETED |
| SAME        | Immune | 9_IFNg+ TNF+ Va7.2+ CD161 % of CD3+             | old: NS           | new: NS           |
| SAME        | Immune | 9_IFNg+ TNF+ Va7.2+ CD161 % of CD3+             | old: NS           | new: NS           |
| SAME        | Immune | 6_CD25+ % of CD4+2                              | old: NS           | new: NS           |
| SAME        | Immune | 3_CD14hi CD16- HLA-DR+ CD16+/HLA-DR- CD16-% of  | old: YES-ENRICHED | new: YES-ENRICHED |
| SAME        | Immune | 3_CD14hi CD16- HLA-DR+ CD16+/HLA-DR- CD16-% of  | old: YES-DEPLETED | new: YES-DEPLETED |
| SAME        | Immune | 3_CD14hi CD16- HLA-DR+ CD16+/HLA-DR- CD16-% of  | old: NS           | new: NS           |
| SAME        | Immune | 3_CD14- CD16- HLA-DR+ CD4dim/- /ul              | old: NS           | new: NS           |
| SAME        | Immune | 3_CD14- CD16- HLA-DR+ CD4dim/- /ul              | old: YES-ENRICHED | new: YES-ENRICHED |
| SAME        | Immune | 3_CD14- CD16- HLA-DR+ CD4dim/- /ul              | old: NS           | new: NS           |
| SAME        | Immune | 5_CD25- CD4+ CD8- CD3+ /ul                      | old: YES-DEPLETED | new: YES-DEPLETED |
| SAME        | Immune | 5_CD25- CD4+ CD8- CD3+ /ul                      | old: YES-ENRICHED | new: YES-ENRICHED |
| SAME        | Immune | 5_CD25- CD4+ CD8- CD3+ /ul                      | old: NS           | new: NS           |
| SAME        | Immune | 8_GMCSF- IL-2+ IL-17- CD4+ CD3+ /ul             | old: YES-DEPLETED | new: YES-DEPLETED |
| SAME        | Immune | 8_GMCSF- IL-2+ IL-17- CD4+ CD3+ /ul             | old: YES-ENRICHED | new: YES-ENRICHED |
| SAME        | Immune | 8_GMCSF- IL-2+ IL-17- CD4+ CD3+ /ul             | old: NS           | new: NS           |
| SAME        | Immune | 2_CD39+ CD45RA- CD25high CD127low CD4+ /ul      | old: YES-DEPLETED | new: YES-DEPLETED |
| SAME        | Immune | 2_CD39+ CD45RA- CD25high CD127low CD4+ /ul      | old: NS           | new: NS           |
| SAME        | Immune | 2_CD39+ CD45RA- CD25high CD127low CD4+ /ul      | old: NS           | new: NS           |
| SAME        | Immune | 6_CD27bright CD161+ CCR6+ CXCR3- CD25- CD4+ /ul | old: YES-DEPLETED | new: YES-DEPLETED |
| SAME        | Immune | 6_CD27bright CD161+ CCR6+ CXCR3- CD25- CD4+ /ul | old: NS           | new: NS           |
| SAME        | Immune | 6_CD27bright CD161+ CCR6+ CXCR3- CD25- CD4+ /ul | old: NS           | new: NS           |
| SAME        | Immune | 3_CD14hi CD16+ HLA-DR+ CD16+/HLA-DR- CD16-% of  | old: YES-ENRICHED | new: YES-ENRICHED |
| SAME        | Immune | 3_CD14hi CD16+ HLA-DR+ CD16+/HLA-DR- CD16-% of  | old: YES-DEPLETED | new: YES-DEPLETED |
| SAME        | Immune | 3_CD14hi CD16+ HLA-DR+ CD16+/HLA-DR- CD16-% of  | old: NS           | new: NS           |
| SAME        | Immune | 7_IFNg- IL17a- CD4+ CD3+ /ul                    | old: YES-DEPLETED | new: YES-DEPLETED |
| SAME        | Immune | 7_IFNg- IL17a- CD4+ CD3+ /ul                    | old: YES-ENRICHED | new: YES-ENRICHED |
| SAME        | Immune | 7_IFNg- IL17a- CD4+ CD3+ /ul                    | old: NS           | new: NS           |
| SAME        | Immune | 6_CD25- % of CD4+                               | old: NS           | new: NS           |
| SAME        | Immune | 6_CD161+ CCR6- CXCR3- CD25+ CD4+ /ul            | old: YES-DEPLETED | new: YES-DEPLETED |
| SAME        | Immune | 6_CD161+ CCR6- CXCR3- CD25+ CD4+ /ul            | old: YES-ENRICHED | new: YES-ENRICHED |
| SAME        | Immune | 6_CD161+ CCR6- CXCR3- CD25+ CD4+ /ul            | old: NS           | new: NS           |
| SAME        | Immune | 8_TNFa- IL-5- % of IL-17- CD3+                  | old: NS           | new: NS           |
| SAME        | Immune | 8_TNFa- IL-5- % of IL-17- CD3+                  | old: NS           | new: NS           |
| SAME        | Immune | 8_TNFa+ IL-5+ IL-17- % of CD3+                  | old: YES-DEPLETED | new: YES-DEPLETED |
| SAME        | Immune | 8_TNFa+ IL-5+ IL-17- % of CD3+                  | old: NS           | new: NS           |
| SAME        | Immune | 8_TNFa+ IL-5+ IL-17- % of CD3+                  | old: NS           | new: NS           |
| SAME        | Immune | 1_CD4+ CD8- % of CD3+                           | old: NS           | new: NS           |
| SAME        | Immune | 1_CD4+ CD8- % of CD3+                           | old: NS           | new: NS           |
| SAME        | Immune | 8_GMCSF- IL-2- IL-17- CD4+ CD3+ /ul             | old: YES-DEPLETED | new: YES-DEPLETED |
| SAME        | Immune | 8_GMCSF- IL-2- IL-17- CD4+ CD3+ /ul             | old: YES-ENRICHED | new: YES-ENRICHED |
| SAME        | Immune | 8_GMCSF- IL-2- IL-17- CD4+ CD3+ /ul             | old: NS           | new: NS           |
| SAME        | Immune | 5_CD24- CD45RO- CD25+ CD4+ % of CD4high CD8-    | old: YES-DEPLETED | new: YES-DEPLETED |
| SAME        | Immune | 5_CD24- CD45RO- CD25+ CD4+ % of CD4high CD8-    | old: NS           | new: NS           |
| SAME        | Immune | 5_CD24- CD45RO- CD25+ CD4+ % of CD4high CD8-    | old: NS           | new: NS           |
| SAME        | Immune | 8_TNFa+ IL-5- % of IL-17- CD3+                  | old: YES-DEPLETED | new: YES-DEPLETED |
| SAME        | Immune | 8_TNFa+ IL-5- % of IL-17- CD3+                  | old: NS           | new: NS           |
| SAME        | Immune | 8_TNFa+ IL-5- % of IL-17- CD3+                  | old: NS           | new: NS           |
| SAME        | Immune | 3_HLA-DR+ CD4dim/- % of PBMCs                   | old: YES-ENRICHED | new: YES-ENRICHED |
| SAME        | Immune | 3_HLA-DR+ CD4dim/- % of PBMCs                   | old: YES-DEPLETED | new: YES-DEPLETED |
| SAME        | Immune | 3_HLA-DR+ CD4dim/- % of PBMCs                   | old: NS           | new: NS           |
| SAME        | Immune | 5_CD24+ % of CD4high CD8dim                     | old: NS           | new: NS           |
| SAME        | Immune | 5_CD24+ % of CD4high CD8dim                     | old: YES-ENRICHED | new: YES-ENRICHED |
| SAME        | Immune | 5_CD24+ % of CD4high CD8dim                     | old: NS           | new: NS           |
| SAME        | Immune | 8_IL-10- IL-2- IL-17- CD4+ CD3+ /ul             | old: YES-DEPLETED | new: YES-DEPLETED |
| SAME        | Immune | 8_IL-10- IL-2- IL-17- CD4+ CD3+ /ul             | old: YES-ENRICHED | new: YES-ENRICHED |
| SAME        | Immune | 8_IL-10- IL-2- IL-17- CD4+ CD3+ /ul             | old: NS           | new: NS           |
| SAME        | Immune | 5_CD62L- CD45RO+ CD8+ CD4- CD3+ /ul             | old: YES-DEPLETED | new: YES-DEPLETED |
| SAME        | Immune | 5_CD62L- CD45RO+ CD8+ CD4- CD3+ /ul             | old: YES-ENRICHED | new: YES-ENRICHED |
| SAME        | Immune | 5_CD62L- CD45RO+ CD8+ CD4- CD3+ /ul             | old: NS           | new: NS           |
| SAME        | Immune | 2_FoxP3+ CD45RA- CD25high CD127low CD4+ /ul     | old: YES-DEPLETED | new: YES-DEPLETED |
| SAME        | Immune | 2_FoxP3+ CD45RA- CD25high CD127low CD4+ /ul     | old: NS           | new: NS           |
| SAME        | Immune | 2_FoxP3+ CD45RA- CD25high CD127low CD4+ /ul     | old: NS           | new: NS           |
| SAME        | Immune | 9_IL17a- TNF+ Va7.2+ CD161+ CD4- CD3+ /ul       | old: YES-DEPLETED | new: YES-DEPLETED |
| SAME        | Immune | 9_IL17a- TNF+ Va7.2+ CD161+ CD4- CD3+ /ul       | old: NS           | new: NS           |
| SAME        | Immune | 9_IL17a- TNF+ Va7.2+ CD161+ CD4- CD3+ /ul       | old: NS           | new: NS           |

Table S4

| Concordance | Space                                 | Feature                                                 | Status, BMI-naive | Status, BMI-aware |
|-------------|---------------------------------------|---------------------------------------------------------|-------------------|-------------------|
| SAME        | Immune                                | 9_IL2+ TNFa+ Va7.2+ CD161 % of CD3+                     | old: NS           | new: NS           |
| SAME        | Immune                                | 9_IL2+ TNFa+ Va7.2+ CD161 % of CD3+                     | old: NS           | new: NS           |
| SAME        | Immune                                | 5_CD24+ CD45RO+ CD8+ CD4- CD3+ /ul                      | old: NS           | new: NS           |
| SAME        | Immune                                | 5_CD24+ CD45RO+ CD8+ CD4- CD3+ /ul                      | old: YES-ENRICHED | new: YES-ENRICHED |
| SAME        | Immune                                | 5_CD24+ CD45RO+ CD8+ CD4- CD3+ /ul                      | old: NS           | new: NS           |
| SAME        | Immune                                | 5_CD4_Tcm/Treg                                          | old: NS           | new: NS           |
| SAME        | Immune                                | 3_CD14hi CD16+ % of HLA-DR+ CD16+/HLA-DR- CD16          | old: YES-ENRICHED | new: YES-ENRICHED |
| SAME        | Immune                                | 3_CD14hi CD16+ % of HLA-DR+ CD16+/HLA-DR- CD16          | old: YES-DEPLETED | new: YES-DEPLETED |
| SAME        | Immune                                | 3_CD14hi CD16+ % of HLA-DR+ CD16+/HLA-DR- CD16          | old: NS           | new: NS           |
| SAME        | Immune                                | 6_CD161+ CCR6+ CXCR3- CD25+ CD4+ /ul                    | old: NS           | new: NS           |
| SAME        | Immune                                | 6_CD161+ CCR6+ CXCR3- CD25+ CD4+ /ul                    | old: NS           | new: NS           |
| SAME        | Immune                                | 8_IL-10- IL-2- IL-17+ CD4+ CD3+ /ul                     | old: YES-DEPLETED | new: YES-DEPLETED |
| SAME        | Immune                                | 8_IL-10- IL-2- IL-17+ CD4+ CD3+ /ul                     | old: YES-ENRICHED | new: YES-ENRICHED |
| SAME        | Immune                                | 8_IL-10- IL-2- IL-17+ CD4+ CD3+ /ul                     | old: NS           | new: NS           |
| SAME        | Immune                                | 5_CD62L+ CD45RO- CD25+ CD4+ CD8- CD3+ /ul               | old: YES-DEPLETED | new: YES-DEPLETED |
| SAME        | Immune                                | 5_CD62L+ CD45RO- CD25+ CD4+ CD8- CD3+ /ul               | old: YES-ENRICHED | new: YES-ENRICHED |
| SAME        | Immune                                | 5_CD62L+ CD45RO- CD25+ CD4+ CD8- CD3+ /ul               | old: NS           | new: NS           |
| SAME        | Immune                                | 5_CD25+ CD4+ CD8- CD3+ /ul                              | old: YES-DEPLETED | new: YES-DEPLETED |
| SAME        | Immune                                | 5_CD25+ CD4+ CD8- CD3+ /ul                              | old: YES-ENRICHED | new: YES-ENRICHED |
| SAME        | Immune                                | 5_CD25+ CD4+ CD8- CD3+ /ul                              | old: YES-DEPLETED | new: YES-DEPLETED |
| SAME        | Immune                                | 8_IL-10- IL-2+ IL-17+ CD4+ CD3+ /ul                     | old: YES-DEPLETED | new: YES-DEPLETED |
| SAME        | Immune                                | 8_IL-10- IL-2+ IL-17+ CD4+ CD3+ /ul                     | old: YES-ENRICHED | new: YES-ENRICHED |
| SAME        | Immune                                | 8_IL-10- IL-2+ IL-17+ CD4+ CD3+ /ul                     | old: NS           | new: NS           |
| SAME        | Immune                                | 6_CD27bright CD25- % of CD4+                            | old: NS           | new: NS           |
| SAME        | Immune                                | 6_CD27bright CD25- % of CD4+                            | old: YES-ENRICHED | new: YES-ENRICHED |
| SAME        | Immune                                | 6_CD27bright CD25- % of CD4+                            | old: NS           | new: NS           |
| SAME        | Immune                                | 8_TNFa+ IL-5- IL-17+ CD4+ CD3+ /ul                      | old: YES-DEPLETED | new: YES-DEPLETED |
| SAME        | Immune                                | 8_TNFa+ IL-5- IL-17+ CD4+ CD3+ /ul                      | old: YES-ENRICHED | new: YES-ENRICHED |
| SAME        | Immune                                | 8_TNFa+ IL-5- IL-17+ CD4+ CD3+ /ul                      | old: NS           | new: NS           |
| SAME        | Immune                                | 3_CD4high % of PBMCs                                    | old: YES-DEPLETED | new: YES-DEPLETED |
| SAME        | Immune                                | 3_CD4high % of PBMCs                                    | old: NS           | new: NS           |
| SAME        | Immune                                | 3_CD4high % of PBMCs                                    | old: NS           | new: NS           |
| SAME        | Immune                                | 6_CD161- CCR6- CXCR3- CD25- CD4+ /ul                    | old: YES-DEPLETED | new: YES-DEPLETED |
| SAME        | Immune                                | 6_CD161- CCR6- CXCR3- CD25- CD4+ /ul                    | old: YES-ENRICHED | new: YES-ENRICHED |
| SAME        | Immune                                | 6_CD161- CCR6- CXCR3- CD25- CD4+ /ul                    | old: NS           | new: NS           |
| SAME        | Immune                                | 5_CD62L+ CD45RO- % of CD8+ CD4-                         | old: YES-DEPLETED | new: YES-DEPLETED |
| SAME        | Immune                                | 5_CD62L+ CD45RO- % of CD8+ CD4-                         | old: NS           | new: NS           |
| SAME        | Immune                                | 5_CD62L+ CD45RO- % of CD8+ CD4-                         | old: NS           | new: NS           |
| SAME        | Immune                                | 7_Helios- Ki67- % of CD3+                               | old: NS           | new: NS           |
| SAME        | Immune                                | 7_Helios- Ki67- % of CD3+                               | old: YES-ENRICHED | new: YES-ENRICHED |
| SAME        | Immune                                | 7_Helios- Ki67- % of CD3+                               | old: YES-ENRICHED | new: YES-ENRICHED |
| SAME        | Immune                                | 8_TNFa+ IL-2+ IL-17+ CD4+ CD3+ /ul                      | old: YES-DEPLETED | new: YES-DEPLETED |
| SAME        | Immune                                | 8_TNFa+ IL-2+ IL-17+ CD4+ CD3+ /ul                      | old: YES-ENRICHED | new: YES-ENRICHED |
| SAME        | Immune                                | 8_TNFa+ IL-2+ IL-17+ CD4+ CD3+ /ul                      | old: NS           | new: NS           |
| SAME        | Immune                                | 6_CXCR3- CD25- CD4+ /ul                                 | old: YES-DEPLETED | new: YES-DEPLETED |
| SAME        | Immune                                | 6_CXCR3- CD25- CD4+ /ul                                 | old: YES-ENRICHED | new: YES-ENRICHED |
| SAME        | Immune                                | 6_CXCR3- CD25- CD4+ /ul                                 | old: NS           | new: NS           |
| SAME        | Immune                                | 3_CD123+ % of CD14- CD16- HLA-DR+ CD4dim/-              | old: YES-ENRICHED | new: YES-ENRICHED |
| SAME        | Immune                                | 3_CD123+ % of CD14- CD16- HLA-DR+ CD4dim/-              | old: YES-DEPLETED | new: YES-DEPLETED |
| SAME        | Immune                                | 3_CD123+ % of CD14- CD16- HLA-DR+ CD4dim/-              | old: NS           | new: NS           |
| SAME        | Immune                                | 8_TNFa+ IL-2- IL-17- % of CD3+                          | old: YES-DEPLETED | new: YES-DEPLETED |
| SAME        | Immune                                | 8_TNFa+ IL-2- IL-17- % of CD3+                          | old: NS           | new: NS           |
| SAME        | Immune                                | 8_TNFa+ IL-2- IL-17- % of CD3+                          | old: NS           | new: NS           |
| SAME        | Immune                                | 8_TNFa+ IL-2- IL-17- % of CD3+                          | old: NS           | new: NS           |
| SAME        | Immune                                | 1_CD11c+ CD14+ CD3- CD19- % of PBMCs                    | old: YES-ENRICHED | new: YES-ENRICHED |
| SAME        | Immune                                | 1_CD11c+ CD14+ CD3- CD19- % of PBMCs                    | old: YES-DEPLETED | new: YES-DEPLETED |
| SAME        | Immune                                | 1_CD11c+ CD14+ CD3- CD19- % of PBMCs                    | old: NS           | new: NS           |
| SAME        | Microbiome-Function-KEGG/GMM-rarefied | MF0041: histidine degradation                           | old: NS           | new: NS           |
| SAME        | Microbiome-Function-KEGG/GMM-rarefied | MF0041: histidine degradation                           | old: YES-DEPLETED | new: YES-DEPLETED |
| SAME        | Microbiome-Function-KEGG/GMM-rarefied | MF0041: histidine degradation                           | old: NS           | new: NS           |
| SAME        | Microbiome-Function-KEGG/GMM-rarefied | M00128: Ubiquinone biosynthesis, eukaryotes, 4-hydroxy  | old: NS           | new: NS           |
| SAME        | Microbiome-Function-KEGG/GMM-rarefied | M00128: Ubiquinone biosynthesis, eukaryotes, 4-hydroxy  | old: NS           | new: NS           |
| SAME        | Microbiome-Function-KEGG/GMM-rarefied | M00128: Ubiquinone biosynthesis, eukaryotes, 4-hydroxy  | old: YES-DEPLETED | new: YES-DEPLETED |
| SAME        | Microbiome-Function-KEGG/GMM-rarefied | M00485: KinABCDE-Spo0FA (sporulation control) two-co    | old: NS           | new: NS           |
| SAME        | Microbiome-Function-KEGG/GMM-rarefied | M00485: KinABCDE-Spo0FA (sporulation control) two-co    | old: YES-ENRICHED | new: YES-ENRICHED |
| SAME        | Microbiome-Function-KEGG/GMM-rarefied | M00485: KinABCDE-Spo0FA (sporulation control) two-co    | old: NS           | new: NS           |
| SAME        | Microbiome-Function-KEGG/GMM-rarefied | M00098: Acylglycerol degradation                        | old: NS           | new: NS           |
| SAME        | Microbiome-Function-KEGG/GMM-rarefied | M00098: Acylglycerol degradation                        | old: YES-ENRICHED | new: YES-ENRICHED |
| SAME        | Microbiome-Function-KEGG/GMM-rarefied | M00098: Acylglycerol degradation                        | old: NS           | new: NS           |
| SAME        | Microbiome-Function-KEGG/GMM-rarefied | M00699: Multidrug resistance, efflux pump AmeABC        | old: YES-ENRICHED | new: YES-ENRICHED |
| SAME        | Microbiome-Function-KEGG/GMM-rarefied | M00699: Multidrug resistance, efflux pump AmeABC        | old: YES-DEPLETED | new: YES-DEPLETED |
| SAME        | Microbiome-Function-KEGG/GMM-rarefied | M00699: Multidrug resistance, efflux pump AmeABC        | old: NS           | new: NS           |
| SAME        | Microbiome-Function-KEGG/GMM-rarefied | M00078: Heparan sulfate degradation                     | old: YES-ENRICHED | new: YES-ENRICHED |
| SAME        | Microbiome-Function-KEGG/GMM-rarefied | M00078: Heparan sulfate degradation                     | old: YES-DEPLETED | new: YES-DEPLETED |
| SAME        | Microbiome-Function-KEGG/GMM-rarefied | M00078: Heparan sulfate degradation                     | old: NS           | new: NS           |
| SAME        | Microbiome-Function-KEGG/GMM-rarefied | M00014: Glucuronate pathway (uronate pathway)           | old: YES-ENRICHED | new: YES-ENRICHED |
| SAME        | Microbiome-Function-KEGG/GMM-rarefied | M00014: Glucuronate pathway (uronate pathway)           | old: YES-DEPLETED | new: YES-DEPLETED |
| SAME        | Microbiome-Function-KEGG/GMM-rarefied | M00014: Glucuronate pathway (uronate pathway)           | old: NS           | new: NS           |
| SAME        | Microbiome-Function-KEGG/GMM-rarefied | M00324: Dipeptide transport system                      | old: YES-DEPLETED | new: YES-DEPLETED |
| SAME        | Microbiome-Function-KEGG/GMM-rarefied | M00324: Dipeptide transport system                      | old: NS           | new: NS           |
| SAME        | Microbiome-Function-KEGG/GMM-rarefied | M00324: Dipeptide transport system                      | old: YES-DEPLETED | new: YES-DEPLETED |
| SAME        | Microbiome-Function-KEGG/GMM-rarefied | M00613: Anoxygenic photosynthesis in green nonsulfur b  | old: YES-ENRICHED | new: YES-ENRICHED |
| SAME        | Microbiome-Function-KEGG/GMM-rarefied | M00613: Anoxygenic photosynthesis in green nonsulfur b  | old: YES-DEPLETED | new: YES-DEPLETED |
| SAME        | Microbiome-Function-KEGG/GMM-rarefied | M00613: Anoxygenic photosynthesis in green nonsulfur b  | old: NS           | new: NS           |
| SAME        | Microbiome-Function-KEGG/GMM-rarefied | M00291: MRN complex                                     | old: NS           | new: NS           |
| SAME        | Microbiome-Function-KEGG/GMM-rarefied | M00291: MRN complex                                     | old: YES-DEPLETED | new: YES-DEPLETED |
| SAME        | Microbiome-Function-KEGG/GMM-rarefied | M00291: MRN complex                                     | old: YES-DEPLETED | new: YES-DEPLETED |
| SAME        | Microbiome-Function-KEGG/GMM-rarefied | M00718: Multidrug resistance, efflux pump MexAB-OprM    | old: YES-ENRICHED | new: YES-ENRICHED |
| SAME        | Microbiome-Function-KEGG/GMM-rarefied | M00718: Multidrug resistance, efflux pump MexAB-OprM    | old: YES-DEPLETED | new: YES-DEPLETED |
| SAME        | Microbiome-Function-KEGG/GMM-rarefied | M00718: Multidrug resistance, efflux pump MexAB-OprM    | old: NS           | new: NS           |
| SAME        | Microbiome-Function-KEGG/GMM-rarefied | M00565: Trehalose biosynthesis, D-glucose 1P => trehal  | old: YES-DEPLETED | new: YES-DEPLETED |
| SAME        | Microbiome-Function-KEGG/GMM-rarefied | M00565: Trehalose biosynthesis, D-glucose 1P => trehal  | old: YES-ENRICHED | new: YES-ENRICHED |
| SAME        | Microbiome-Function-KEGG/GMM-rarefied | M00565: Trehalose biosynthesis, D-glucose 1P => trehal  | old: NS           | new: NS           |
| SAME        | Microbiome-Function-KEGG/GMM-rarefied | M00277: PTS system, N-acetylgalactosamine-specific II c | old: NS           | new: NS           |
| SAME        | Microbiome-Function-KEGG/GMM-rarefied | M00277: PTS system, N-acetylgalactosamine-specific II c | old: NS           | new: NS           |
| SAME        | Microbiome-Function-KEGG/GMM-rarefied | M00729: Fluoroquinolone resistance, gyrase-protecting p | old: YES-DEPLETED | new: YES-DEPLETED |
| SAME        | Microbiome-Function-KEGG/GMM-rarefied | M00729: Fluoroquinolone resistance, gyrase-protecting p | old: YES-ENRICHED | new: YES-ENRICHED |
| SAME        | Microbiome-Function-KEGG/GMM-rarefied | M00729: Fluoroquinolone resistance, gyrase-protecting p | old: NS           | new: NS           |

Table S4

| Concordance | Space                                 | Feature                                                | Status, BMI-naive | Status, BMI-aware |
|-------------|---------------------------------------|--------------------------------------------------------|-------------------|-------------------|
| SAME        | Microbiome-Function-KEGG/GMM-rarefied | M00488: DcuS-DcuR (C4-dicarboxylate metabolism) two-   | old: NS           | new: NS           |
| SAME        | Microbiome-Function-KEGG/GMM-rarefied | M00488: DcuS-DcuR (C4-dicarboxylate metabolism) two-   | old: NS           | new: NS           |
| SAME        | Microbiome-Function-KEGG/GMM-rarefied | M00488: DcuS-DcuR (C4-dicarboxylate metabolism) two-   | old: YES-DEPLETED | new: YES-DEPLETED |
| SAME        | Microbiome-Function-KEGG/GMM-rarefied | M00269: PTS system, sucrose-specific II component      | old: NS           | new: NS           |
| SAME        | Microbiome-Function-KEGG/GMM-rarefied | M00269: PTS system, sucrose-specific II component      | old: NS           | new: NS           |
| SAME        | Microbiome-Function-KEGG/GMM-rarefied | M00269: PTS system, sucrose-specific II component      | old: YES-DEPLETED | new: YES-DEPLETED |
| SAME        | Microbiome-Function-KEGG/GMM-rarefied | M00646: Multidrug resistance, efflux pump AcrAD-TolC   | old: YES-ENRICHED | new: YES-ENRICHED |
| SAME        | Microbiome-Function-KEGG/GMM-rarefied | M00646: Multidrug resistance, efflux pump AcrAD-TolC   | old: YES-DEPLETED | new: YES-DEPLETED |
| SAME        | Microbiome-Function-KEGG/GMM-rarefied | M00646: Multidrug resistance, efflux pump AcrAD-TolC   | old: NS           | new: NS           |
| SAME        | Microbiome-Function-KEGG/GMM-rarefied | M00497: GlnL-GlnG (nitrogen regulation) two-component  | old: YES-ENRICHED | new: YES-ENRICHED |
| SAME        | Microbiome-Function-KEGG/GMM-rarefied | M00497: GlnL-GlnG (nitrogen regulation) two-component  | old: YES-DEPLETED | new: YES-DEPLETED |
| SAME        | Microbiome-Function-KEGG/GMM-rarefied | M00497: GlnL-GlnG (nitrogen regulation) two-component  | old: NS           | new: NS           |
| SAME        | Microbiome-Function-KEGG/GMM-rarefied | MF0048: lactose degradation                            | old: YES-ENRICHED | new: YES-ENRICHED |
| SAME        | Microbiome-Function-KEGG/GMM-rarefied | MF0048: lactose degradation                            | old: YES-DEPLETED | new: YES-DEPLETED |
| SAME        | Microbiome-Function-KEGG/GMM-rarefied | MF0048: lactose degradation                            | old: NS           | new: NS           |
| SAME        | Microbiome-Function-KEGG/GMM-rarefied | M00550: Ascorbate degradation, ascorbate => D-xylulose | old: NS           | new: NS           |
| SAME        | Microbiome-Function-KEGG/GMM-rarefied | M00550: Ascorbate degradation, ascorbate => D-xylulose | old: YES-DEPLETED | new: YES-DEPLETED |
| SAME        | Microbiome-Function-KEGG/GMM-rarefied | M00550: Ascorbate degradation, ascorbate => D-xylulose | old: NS           | new: NS           |
| SAME        | Microbiome-Function-KEGG/GMM-rarefied | M00185: Sulfate transport system                       | old: NS           | new: NS           |
| SAME        | Microbiome-Function-KEGG/GMM-rarefied | M00185: Sulfate transport system                       | old: NS           | new: NS           |
| SAME        | Microbiome-Function-KEGG/GMM-rarefied | M00185: Sulfate transport system                       | old: NS           | new: NS           |
| SAME        | Microbiome-Function-KEGG/GMM-rarefied | M00191: Thiamine transport system                      | old: YES-DEPLETED | new: YES-DEPLETED |
| SAME        | Microbiome-Function-KEGG/GMM-rarefied | M00191: Thiamine transport system                      | old: NS           | new: NS           |
| SAME        | Microbiome-Function-KEGG/GMM-rarefied | M00191: Thiamine transport system                      | old: YES-DEPLETED | new: YES-DEPLETED |
| SAME        | Microbiome-Function-KEGG/GMM-rarefied | M00822: Multidrug resistance, efflux pump MexMN-OprM   | old: YES-ENRICHED | new: YES-ENRICHED |
| SAME        | Microbiome-Function-KEGG/GMM-rarefied | M00822: Multidrug resistance, efflux pump MexMN-OprM   | old: YES-DEPLETED | new: YES-DEPLETED |
| SAME        | Microbiome-Function-KEGG/GMM-rarefied | M00822: Multidrug resistance, efflux pump MexMN-OprM   | old: NS           | new: NS           |
| SAME        | Microbiome-Function-KEGG/GMM-rarefied | M00192: Putative thiamine transport system             | old: YES-DEPLETED | new: YES-DEPLETED |
| SAME        | Microbiome-Function-KEGG/GMM-rarefied | M00192: Putative thiamine transport system             | old: NS           | new: NS           |
| SAME        | Microbiome-Function-KEGG/GMM-rarefied | M00192: Putative thiamine transport system             | old: YES-DEPLETED | new: YES-DEPLETED |
| SAME        | Microbiome-Function-KEGG/GMM-rarefied | M00076: Dermatan sulfate degradation                   | old: YES-ENRICHED | new: YES-ENRICHED |
| SAME        | Microbiome-Function-KEGG/GMM-rarefied | M00076: Dermatan sulfate degradation                   | old: YES-DEPLETED | new: YES-DEPLETED |
| SAME        | Microbiome-Function-KEGG/GMM-rarefied | M00076: Dermatan sulfate degradation                   | old: NS           | new: NS           |
| SAME        | Microbiome-Function-KEGG/GMM-rarefied | M00077: Chondroitin sulfate degradation                | old: YES-ENRICHED | new: YES-ENRICHED |
| SAME        | Microbiome-Function-KEGG/GMM-rarefied | M00077: Chondroitin sulfate degradation                | old: YES-DEPLETED | new: YES-DEPLETED |
| SAME        | Microbiome-Function-KEGG/GMM-rarefied | M00077: Chondroitin sulfate degradation                | old: NS           | new: NS           |
| SAME        | Microbiome-Function-KEGG/GMM-rarefied | M00839: PdtAS-PdtAR two-component regulatory system    | old: NS           | new: NS           |
| SAME        | Microbiome-Function-KEGG/GMM-rarefied | M00839: PdtAS-PdtAR two-component regulatory system    | old: YES-DEPLETED | new: YES-DEPLETED |
| SAME        | Microbiome-Function-KEGG/GMM-rarefied | M00839: PdtAS-PdtAR two-component regulatory system    | old: NS           | new: NS           |
| SAME        | Microbiome-Function-KEGG/GMM-rarefied | M00533: Homoprotocatechuate degradation, homoprotoc    | old: YES-DEPLETED | new: YES-DEPLETED |
| SAME        | Microbiome-Function-KEGG/GMM-rarefied | M00533: Homoprotocatechuate degradation, homoprotoc    | old: NS           | new: NS           |
| SAME        | Microbiome-Function-KEGG/GMM-rarefied | M00533: Homoprotocatechuate degradation, homoprotoc    | old: NS           | new: NS           |
| SAME        | Microbiome-Function-KEGG/GMM-rarefied | M00611: Oxygenic photosynthesis in plants and cyanoba  | old: YES-DEPLETED | new: YES-DEPLETED |
| SAME        | Microbiome-Function-KEGG/GMM-rarefied | M00611: Oxygenic photosynthesis in plants and cyanoba  | old: YES-ENRICHED | new: YES-ENRICHED |
| SAME        | Microbiome-Function-KEGG/GMM-rarefied | M00611: Oxygenic photosynthesis in plants and cyanoba  | old: NS           | new: NS           |
| SAME        | Microbiome-Function-KEGG/GMM-rarefied | M00581: Biotin transport system                        | old: YES-DEPLETED | new: YES-DEPLETED |
| SAME        | Microbiome-Function-KEGG/GMM-rarefied | M00581: Biotin transport system                        | old: YES-ENRICHED | new: YES-ENRICHED |
| SAME        | Microbiome-Function-KEGG/GMM-rarefied | M00581: Biotin transport system                        | old: NS           | new: NS           |
| SAME        | Microbiome-Function-KEGG/GMM-rarefied | M00208: Glycine betaine/proline transport system       | old: NS           | new: NS           |
| SAME        | Microbiome-Function-KEGG/GMM-rarefied | M00208: Glycine betaine/proline transport system       | old: YES-DEPLETED | new: YES-DEPLETED |
| SAME        | Microbiome-Function-KEGG/GMM-rarefied | M00208: Glycine betaine/proline transport system       | old: NS           | new: NS           |
| SAME        | Microbiome-Function-KEGG/GMM-rarefied | M00417: Cytochrome o ubiquinol oxidase                 | old: YES-DEPLETED | new: YES-DEPLETED |
| SAME        | Microbiome-Function-KEGG/GMM-rarefied | M00417: Cytochrome o ubiquinol oxidase                 | old: NS           | new: NS           |
| SAME        | Microbiome-Function-KEGG/GMM-rarefied | M00417: Cytochrome o ubiquinol oxidase                 | old: YES-DEPLETED | new: YES-DEPLETED |
| SAME        | Microbiome-Function-KEGG/GMM-rarefied | M00234: Cystine transport system                       | old: YES-DEPLETED | new: YES-DEPLETED |
| SAME        | Microbiome-Function-KEGG/GMM-rarefied | M00234: Cystine transport system                       | old: YES-ENRICHED | new: YES-ENRICHED |
| SAME        | Microbiome-Function-KEGG/GMM-rarefied | M00234: Cystine transport system                       | old: NS           | new: NS           |
| SAME        | Microbiome-Function-KEGG/GMM-rarefied | M00335: Sec (secretion) system                         | old: YES-DEPLETED | new: YES-DEPLETED |
| SAME        | Microbiome-Function-KEGG/GMM-rarefied | M00335: Sec (secretion) system                         | old: YES-ENRICHED | new: YES-ENRICHED |
| SAME        | Microbiome-Function-KEGG/GMM-rarefied | M00335: Sec (secretion) system                         | old: NS           | new: NS           |
| SAME        | Microbiome-Function-KEGG/GMM-rarefied | M00429: Competence-related DNA transformation transp   | old: YES-DEPLETED | new: YES-DEPLETED |
| SAME        | Microbiome-Function-KEGG/GMM-rarefied | M00429: Competence-related DNA transformation transp   | old: YES-ENRICHED | new: YES-ENRICHED |
| SAME        | Microbiome-Function-KEGG/GMM-rarefied | M00429: Competence-related DNA transformation transp   | old: NS           | new: NS           |
| SAME        | Microbiome-Function-KEGG/GMM-rarefied | MF0045: trehalose degradation                          | old: YES-ENRICHED | new: YES-ENRICHED |
| SAME        | Microbiome-Function-KEGG/GMM-rarefied | MF0045: trehalose degradation                          | old: YES-DEPLETED | new: YES-DEPLETED |
| SAME        | Microbiome-Function-KEGG/GMM-rarefied | MF0045: trehalose degradation                          | old: NS           | new: NS           |
| SAME        | Microbiome-Function-KEGG/GMM-rarefied | M00541: Benzoyl-CoA degradation, benzoyl-CoA => 3-hy   | old: YES-DEPLETED | new: YES-DEPLETED |
| SAME        | Microbiome-Function-KEGG/GMM-rarefied | M00541: Benzoyl-CoA degradation, benzoyl-CoA => 3-hy   | old: YES-ENRICHED | new: YES-ENRICHED |
| SAME        | Microbiome-Function-KEGG/GMM-rarefied | M00541: Benzoyl-CoA degradation, benzoyl-CoA => 3-hy   | old: NS           | new: NS           |
| SAME        | Microbiome-Function-KEGG/GMM-rarefied | M00328: Hemophore/metalloprotease transport system     | old: YES-DEPLETED | new: YES-DEPLETED |
| SAME        | Microbiome-Function-KEGG/GMM-rarefied | M00328: Hemophore/metalloprotease transport system     | old: NS           | new: NS           |
| SAME        | Microbiome-Function-KEGG/GMM-rarefied | M00328: Hemophore/metalloprotease transport system     | old: YES-DEPLETED | new: YES-DEPLETED |
| SAME        | Microbiome-Function-KEGG/GMM-rarefied | M00241: Vitamin B12 transport system                   | old: NS           | new: NS           |
| SAME        | Microbiome-Function-KEGG/GMM-rarefied | M00241: Vitamin B12 transport system                   | old: NS           | new: NS           |
| SAME        | Microbiome-Function-KEGG/GMM-rarefied | M00241: Vitamin B12 transport system                   | old: YES-DEPLETED | new: YES-DEPLETED |
| SAME        | Microbiome-Function-KEGG/GMM-rarefied | M00628: beta-Lactam resistance, AmpC system            | old: NS           | new: NS           |
| SAME        | Microbiome-Function-KEGG/GMM-rarefied | M00628: beta-Lactam resistance, AmpC system            | old: YES-DEPLETED | new: YES-DEPLETED |
| SAME        | Microbiome-Function-KEGG/GMM-rarefied | M00628: beta-Lactam resistance, AmpC system            | old: NS           | new: NS           |
| SAME        | Microbiome-Function-KEGG/GMM-rarefied | M00278: PTS system, sorbose-specific II component      | old: NS           | new: NS           |
| SAME        | Microbiome-Function-KEGG/GMM-rarefied | M00278: PTS system, sorbose-specific II component      | old: YES-DEPLETED | new: YES-DEPLETED |
| SAME        | Microbiome-Function-KEGG/GMM-rarefied | M00278: PTS system, sorbose-specific II component      | old: NS           | new: NS           |
| SAME        | Microbiome-Function-KEGG/GMM-rarefied | M00546: Purine degradation, xanthine => urea           | old: NS           | new: NS           |
| SAME        | Microbiome-Function-KEGG/GMM-rarefied | M00546: Purine degradation, xanthine => urea           | old: YES-DEPLETED | new: YES-DEPLETED |
| SAME        | Microbiome-Function-KEGG/GMM-rarefied | M00546: Purine degradation, xanthine => urea           | old: NS           | new: NS           |
| SAME        | Microbiome-Function-KEGG/GMM-rarefied | M00292: MRX complex                                    | old: NS           | new: NS           |
| SAME        | Microbiome-Function-KEGG/GMM-rarefied | M00292: MRX complex                                    | old: YES-DEPLETED | new: YES-DEPLETED |
| SAME        | Microbiome-Function-KEGG/GMM-rarefied | M00292: MRX complex                                    | old: YES-DEPLETED | new: YES-DEPLETED |
| SAME        | Microbiome-Function-KEGG/GMM-rarefied | M00215: D-Xylose transport system                      | old: NS           | new: NS           |
| SAME        | Microbiome-Function-KEGG/GMM-rarefied | M00215: D-Xylose transport system                      | old: YES-DEPLETED | new: YES-DEPLETED |
| SAME        | Microbiome-Function-KEGG/GMM-rarefied | M00215: D-Xylose transport system                      | old: NS           | new: NS           |
| SAME        | Microbiome-Function-KEGG/GMM-rarefied | M00709: Macrolide resistance, MacAB-TolC transporter   | old: YES-ENRICHED | new: YES-ENRICHED |
| SAME        | Microbiome-Function-KEGG/GMM-rarefied | M00709: Macrolide resistance, MacAB-TolC transporter   | old: NS           | new: NS           |
| SAME        | Microbiome-Function-KEGG/GMM-rarefied | M00709: Macrolide resistance, MacAB-TolC transporter   | old: NS           | new: NS           |
| SAME        | Microbiome-Function-KEGG/GMM-rarefied | M00181: RNA polymerase III, eukaryotes                 | old: NS           | new: NS           |
| SAME        | Microbiome-Function-KEGG/GMM-rarefied | M00181: RNA polymerase III, eukaryotes                 | old: YES-ENRICHED | new: YES-ENRICHED |
| SAME        | Microbiome-Function-KEGG/GMM-rarefied | M00181: RNA polymerase III, eukaryotes                 | old: NS           | new: NS           |
| SAME        | Microbiome-Function-KEGG/GMM-rarefied | MF0130: peroxidase                                     | old: NS           | new: NS           |
| SAME        | Microbiome-Function-KEGG/GMM-rarefied | MF0130: peroxidase                                     | old: YES-DEPLETED | new: YES-DEPLETED |

Table S4

| Concordance | Space                                 | Feature                                                  | Status, BMI-naive | Status, BMI-aware |
|-------------|---------------------------------------|----------------------------------------------------------|-------------------|-------------------|
| SAME        | Microbiome-Function-KEGG/GMM-rarefied | MF0130: peroxidase                                       | old: NS           | new: NS           |
| SAME        | Microbiome-Function-KEGG/GMM-rarefied | M00273: PTS system, fructose-specific II component       | old: NS           | new: NS           |
| SAME        | Microbiome-Function-KEGG/GMM-rarefied | M00273: PTS system, fructose-specific II component       | old: NS           | new: NS           |
| SAME        | Microbiome-Function-KEGG/GMM-rarefied | M00275: PTS system, cellobiose-specific II component     | old: NS           | new: NS           |
| SAME        | Microbiome-Function-KEGG/GMM-rarefied | M00275: PTS system, cellobiose-specific II component     | old: YES-DEPLETED | new: YES-DEPLETED |
| SAME        | Microbiome-Function-KEGG/GMM-rarefied | M00275: PTS system, cellobiose-specific II component     | old: YES-DEPLETED | new: YES-DEPLETED |
| SAME        | Microbiome-Function-KEGG/GMM-rarefied | M00178: Ribosome, bacteria                               | old: YES-DEPLETED | new: YES-DEPLETED |
| SAME        | Microbiome-Function-KEGG/GMM-rarefied | M00178: Ribosome, bacteria                               | old: YES-ENRICHED | new: YES-ENRICHED |
| SAME        | Microbiome-Function-KEGG/GMM-rarefied | M00178: Ribosome, bacteria                               | old: NS           | new: NS           |
| SAME        | Microbiome-Function-KEGG/GMM-rarefied | M00055: N-glycan precursor biosynthesis                  | old: YES-ENRICHED | new: YES-ENRICHED |
| SAME        | Microbiome-Function-KEGG/GMM-rarefied | M00055: N-glycan precursor biosynthesis                  | old: YES-DEPLETED | new: YES-DEPLETED |
| SAME        | Microbiome-Function-KEGG/GMM-rarefied | M00055: N-glycan precursor biosynthesis                  | old: NS           | new: NS           |
| SAME        | Microbiome-Function-KEGG/GMM-rarefied | M00209: Osmoprotectant transport system                  | old: NS           | new: NS           |
| SAME        | Microbiome-Function-KEGG/GMM-rarefied | M00209: Osmoprotectant transport system                  | old: YES-DEPLETED | new: YES-DEPLETED |
| SAME        | Microbiome-Function-KEGG/GMM-rarefied | M00209: Osmoprotectant transport system                  | old: NS           | new: NS           |
| SAME        | Microbiome-Function-KEGG/GMM-rarefied | M00486: CitA-CitB (citrate fermentation) two-component r | old: NS           | new: NS           |
| SAME        | Microbiome-Function-KEGG/GMM-rarefied | M00364: C10-C20 isoprenoid biosynthesis, bacteria        | old: YES-DEPLETED | new: YES-DEPLETED |
| SAME        | Microbiome-Function-KEGG/GMM-rarefied | M00364: C10-C20 isoprenoid biosynthesis, bacteria        | old: YES-ENRICHED | new: YES-ENRICHED |
| SAME        | Microbiome-Function-KEGG/GMM-rarefied | M00364: C10-C20 isoprenoid biosynthesis, bacteria        | old: NS           | new: NS           |
| SAME        | Microbiome-Function-KEGG/GMM-rarefied | MF0068: glucarate degradation                            | old: NS           | new: NS           |
| SAME        | Microbiome-Function-KEGG/GMM-rarefied | MF0068: glucarate degradation                            | old: YES-DEPLETED | new: YES-DEPLETED |
| SAME        | Microbiome-Function-KEGG/GMM-rarefied | MF0068: glucarate degradation                            | old: NS           | new: NS           |
| SAME        | Microbiome-Function-KEGG/GMM-rarefied | M00768: Multidrug resistance, efflux pump GesABC         | old: YES-ENRICHED | new: YES-ENRICHED |
| SAME        | Microbiome-Function-KEGG/GMM-rarefied | M00768: Multidrug resistance, efflux pump GesABC         | old: YES-DEPLETED | new: YES-DEPLETED |
| SAME        | Microbiome-Function-KEGG/GMM-rarefied | M00768: Multidrug resistance, efflux pump GesABC         | old: NS           | new: NS           |
| SAME        | Microbiome-Function-KEGG/GMM-rarefied | M00290: Holo-TFIH complex                                | old: YES-DEPLETED | new: YES-DEPLETED |
| SAME        | Microbiome-Function-KEGG/GMM-rarefied | M00290: Holo-TFIH complex                                | old: YES-ENRICHED | new: YES-ENRICHED |
| SAME        | Microbiome-Function-KEGG/GMM-rarefied | M00290: Holo-TFIH complex                                | old: NS           | new: NS           |
| SAME        | Microbiome-Function-KEGG/GMM-rarefied | M00460: MprB-MprA (maintenance of persistent infection   | old: NS           | new: NS           |
| SAME        | Microbiome-Function-KEGG/GMM-rarefied | M00460: MprB-MprA (maintenance of persistent infection   | old: YES-DEPLETED | new: YES-DEPLETED |
| SAME        | Microbiome-Function-KEGG/GMM-rarefied | M00460: MprB-MprA (maintenance of persistent infection   | old: YES-DEPLETED | new: YES-DEPLETED |
| SAME        | Microbiome-Function-KEGG/GMM-rarefied | M00739: Cationic peptide transport system                | old: NS           | new: NS           |
| SAME        | Microbiome-Function-KEGG/GMM-rarefied | M00739: Cationic peptide transport system                | old: NS           | new: NS           |
| SAME        | Microbiome-Function-KEGG/GMM-rarefied | M00739: Cationic peptide transport system                | old: YES-DEPLETED | new: YES-DEPLETED |
| SAME        | Microbiome-Function-KEGG/GMM-rarefied | MF0121: propionate production (acrylate pathway)         | old: YES-ENRICHED | new: YES-ENRICHED |
| SAME        | Microbiome-Function-KEGG/GMM-rarefied | MF0121: propionate production (acrylate pathway)         | old: YES-DEPLETED | new: YES-DEPLETED |
| SAME        | Microbiome-Function-KEGG/GMM-rarefied | MF0121: propionate production (acrylate pathway)         | old: NS           | new: NS           |
| SAME        | Microbiome-Function-KEGG/GMM-rarefied | M00610: PTS system, D-glucosaminatate-specific II compo  | old: NS           | new: NS           |
| SAME        | Microbiome-Function-KEGG/GMM-rarefied | M00610: PTS system, D-glucosaminatate-specific II compo  | old: YES-DEPLETED | new: YES-DEPLETED |
| SAME        | Microbiome-Function-KEGG/GMM-rarefied | M00610: PTS system, D-glucosaminatate-specific II compo  | old: NS           | new: NS           |
| SAME        | Microbiome-Function-KEGG/GMM-rarefied | M00472: NarQ-NarP (nitrate respiration) two-component r  | old: YES-DEPLETED | new: YES-DEPLETED |
| SAME        | Microbiome-Function-KEGG/GMM-rarefied | M00472: NarQ-NarP (nitrate respiration) two-component r  | old: NS           | new: NS           |
| SAME        | Microbiome-Function-KEGG/GMM-rarefied | M00472: NarQ-NarP (nitrate respiration) two-component r  | old: NS           | new: NS           |
| SAME        | Microbiome-Function-KEGG/GMM-rarefied | M00045: Histidine degradation, histidine => N-formiminog | old: NS           | new: NS           |
| SAME        | Microbiome-Function-KEGG/GMM-rarefied | M00045: Histidine degradation, histidine => N-formiminog | old: YES-DEPLETED | new: YES-DEPLETED |
| SAME        | Microbiome-Function-KEGG/GMM-rarefied | M00045: Histidine degradation, histidine => N-formiminog | old: NS           | new: NS           |
| SAME        | Microbiome-Function-KEGG/GMM-rarefied | M00359: Aminoacyl-tRNA biosynthesis, eukaryotes          | old: YES-DEPLETED | new: YES-DEPLETED |
| SAME        | Microbiome-Function-KEGG/GMM-rarefied | M00359: Aminoacyl-tRNA biosynthesis, eukaryotes          | old: YES-ENRICHED | new: YES-ENRICHED |
| SAME        | Microbiome-Function-KEGG/GMM-rarefied | M00359: Aminoacyl-tRNA biosynthesis, eukaryotes          | old: NS           | new: NS           |
| SAME        | Microbiome-Function-KEGG/GMM-rarefied | M00179: Ribosome, archaea                                | old: YES-DEPLETED | new: YES-DEPLETED |
| SAME        | Microbiome-Function-KEGG/GMM-rarefied | M00179: Ribosome, archaea                                | old: YES-ENRICHED | new: YES-ENRICHED |
| SAME        | Microbiome-Function-KEGG/GMM-rarefied | M00179: Ribosome, archaea                                | old: NS           | new: NS           |
| SAME        | Microbiome-Function-KEGG/GMM-rarefied | M00498: NtrY-NtrX (nitrogen regulation) two-component r  | old: YES-ENRICHED | new: YES-ENRICHED |
| SAME        | Microbiome-Function-KEGG/GMM-rarefied | M00498: NtrY-NtrX (nitrogen regulation) two-component r  | old: YES-DEPLETED | new: YES-DEPLETED |
| SAME        | Microbiome-Function-KEGG/GMM-rarefied | M00498: NtrY-NtrX (nitrogen regulation) two-component r  | old: NS           | new: NS           |
| SAME        | Microbiome-Function-KEGG/GMM-rarefied | M00120: Coenzyme A biosynthesis, pantothenate => CoA     | old: YES-DEPLETED | new: YES-DEPLETED |
| SAME        | Microbiome-Function-KEGG/GMM-rarefied | M00120: Coenzyme A biosynthesis, pantothenate => CoA     | old: YES-ENRICHED | new: YES-ENRICHED |
| SAME        | Microbiome-Function-KEGG/GMM-rarefied | M00120: Coenzyme A biosynthesis, pantothenate => CoA     | old: NS           | new: NS           |
| SAME        | Microbiome-Function-KEGG/GMM-rarefied | M00293: DNA polymerase zeta complex                      | old: YES-ENRICHED | new: YES-ENRICHED |
| SAME        | Microbiome-Function-KEGG/GMM-rarefied | M00293: DNA polymerase zeta complex                      | old: YES-DEPLETED | new: YES-DEPLETED |
| SAME        | Microbiome-Function-KEGG/GMM-rarefied | M00293: DNA polymerase zeta complex                      | old: NS           | new: NS           |
| SAME        | Microbiome-Function-KEGG/GMM-rarefied | M00143: NADH dehydrogenase (ubiquinone) Fe-S protein     | old: NS           | new: NS           |
| SAME        | Microbiome-Function-KEGG/GMM-rarefied | M00143: NADH dehydrogenase (ubiquinone) Fe-S protein     | old: YES-DEPLETED | new: YES-DEPLETED |
| SAME        | Microbiome-Function-KEGG/GMM-rarefied | M00143: NADH dehydrogenase (ubiquinone) Fe-S protein     | old: NS           | new: NS           |
| SAME        | Microbiome-Function-KEGG/GMM-rarefied | M00612: Anoxygenic photosynthesis in purple bacteria     | old: YES-DEPLETED | new: YES-DEPLETED |
| SAME        | Microbiome-Function-KEGG/GMM-rarefied | M00612: Anoxygenic photosynthesis in purple bacteria     | old: YES-ENRICHED | new: YES-ENRICHED |
| SAME        | Microbiome-Function-KEGG/GMM-rarefied | M00612: Anoxygenic photosynthesis in purple bacteria     | old: NS           | new: NS           |
| SAME        | Microbiome-Function-KEGG/GMM-rarefied | M00021: Cysteine biosynthesis, serine => cysteine        | old: YES-DEPLETED | new: YES-DEPLETED |
| SAME        | Microbiome-Function-KEGG/GMM-rarefied | M00021: Cysteine biosynthesis, serine => cysteine        | old: YES-ENRICHED | new: YES-ENRICHED |
| SAME        | Microbiome-Function-KEGG/GMM-rarefied | M00021: Cysteine biosynthesis, serine => cysteine        | old: NS           | new: NS           |
| SAME        | Microbiome-Function-KEGG/GMM-rarefied | M00008: Entner-Doudoroff pathway, glucose-6P => glyce    | old: YES-ENRICHED | new: YES-ENRICHED |
| SAME        | Microbiome-Function-KEGG/GMM-rarefied | M00008: Entner-Doudoroff pathway, glucose-6P => glyce    | old: YES-DEPLETED | new: YES-DEPLETED |
| SAME        | Microbiome-Function-KEGG/GMM-rarefied | M00008: Entner-Doudoroff pathway, glucose-6P => glyce    | old: NS           | new: NS           |
| SAME        | Microbiome-Function-KEGG/GMM-rarefied | M00647: Multidrug resistance, efflux pump AcrAB-ToiC/Si  | old: YES-ENRICHED | new: YES-ENRICHED |
| SAME        | Microbiome-Function-KEGG/GMM-rarefied | M00647: Multidrug resistance, efflux pump AcrAB-ToiC/Si  | old: YES-DEPLETED | new: YES-DEPLETED |
| SAME        | Microbiome-Function-KEGG/GMM-rarefied | M00647: Multidrug resistance, efflux pump AcrAB-ToiC/Si  | old: NS           | new: NS           |
| SAME        | Microbiome-Function-KEGG/GMM-rarefied | M00081: Pectin degradation                               | old: YES-ENRICHED | new: YES-ENRICHED |
| SAME        | Microbiome-Function-KEGG/GMM-rarefied | M00081: Pectin degradation                               | old: YES-DEPLETED | new: YES-DEPLETED |
| SAME        | Microbiome-Function-KEGG/GMM-rarefied | M00081: Pectin degradation                               | old: NS           | new: NS           |
| SAME        | Microbiome-Function-KEGG/GMM-rarefied | M00224: Fluoroquinolone transport system                 | old: YES-ENRICHED | new: YES-ENRICHED |
| SAME        | Microbiome-Function-KEGG/GMM-rarefied | M00224: Fluoroquinolone transport system                 | old: YES-DEPLETED | new: YES-DEPLETED |
| SAME        | Microbiome-Function-KEGG/GMM-rarefied | M00224: Fluoroquinolone transport system                 | old: NS           | new: NS           |
| SAME        | Microbiome-Function-KEGG/GMM-rarefied | M00183: RNA polymerase, bacteria                         | old: NS           | new: NS           |
| SAME        | Microbiome-Function-KEGG/GMM-rarefied | M00183: RNA polymerase, bacteria                         | old: YES-ENRICHED | new: YES-ENRICHED |
| SAME        | Microbiome-Function-KEGG/GMM-rarefied | M00183: RNA polymerase, bacteria                         | old: NS           | new: NS           |
| SAME        | Microbiome-Function-KEGG/GMM-rarefied | M00376: 3-Hydroxypropionate bi-cycle                     | old: YES-ENRICHED | new: YES-ENRICHED |
| SAME        | Microbiome-Function-KEGG/GMM-rarefied | M00376: 3-Hydroxypropionate bi-cycle                     | old: YES-DEPLETED | new: YES-DEPLETED |
| SAME        | Microbiome-Function-KEGG/GMM-rarefied | M00376: 3-Hydroxypropionate bi-cycle                     | old: NS           | new: NS           |
| SAME        | Microbiome-Function-KEGG/GMM-rarefied | M00025: Tyrosine biosynthesis, chorismate => tyrosine    | old: YES-DEPLETED | new: YES-DEPLETED |
| SAME        | Microbiome-Function-KEGG/GMM-rarefied | M00025: Tyrosine biosynthesis, chorismate => tyrosine    | old: YES-ENRICHED | new: YES-ENRICHED |
| SAME        | Microbiome-Function-KEGG/GMM-rarefied | M00025: Tyrosine biosynthesis, chorismate => tyrosine    | old: NS           | new: NS           |
| SAME        | Microbiome-Function-KEGG/GMM-rarefied | M00300: Putrescine transport system                      | old: YES-DEPLETED | new: YES-DEPLETED |
| SAME        | Microbiome-Function-KEGG/GMM-rarefied | M00300: Putrescine transport system                      | old: YES-ENRICHED | new: YES-ENRICHED |
| SAME        | Microbiome-Function-KEGG/GMM-rarefied | M00300: Putrescine transport system                      | old: NS           | new: NS           |
| SAME        | Microbiome-Function-KEGG/GMM-rarefied | M00667: Tetracycline resistance, efflux pump             | old: YES-DEPLETED | new: YES-DEPLETED |
| SAME        | Microbiome-Function-KEGG/GMM-rarefied | M00667: Tetracycline resistance, efflux pump             | old: YES-ENRICHED | new: YES-ENRICHED |
| SAME        | Microbiome-Function-KEGG/GMM-rarefied | M00667: Tetracycline resistance, efflux pump             | old: NS           | new: NS           |



Table S4

| Concordance | Space                                 | Feature                                                 | Status, BMI-naive | Status, BMI-aware |
|-------------|---------------------------------------|---------------------------------------------------------|-------------------|-------------------|
| SAME        | Microbiome-Function-KEGG/GMM-rarefied | M00279: PTS system, galactitol-specific II component    | old: YES-ENRICHED | new: YES-ENRICHED |
| SAME        | Microbiome-Function-KEGG/GMM-rarefied | M00279: PTS system, galactitol-specific II component    | old: YES-DEPLETED | new: YES-DEPLETED |
| SAME        | Microbiome-Function-KEGG/GMM-rarefied | M00279: PTS system, galactitol-specific II component    | old: NS           | new: NS           |
| SAME        | Microbiome-Function-KEGG/GMM-rarefied | MF0126: propionate production via transferase           | old: YES-ENRICHED | new: YES-ENRICHED |
| SAME        | Microbiome-Function-KEGG/GMM-rarefied | MF0126: propionate production via transferase           | old: YES-DEPLETED | new: YES-DEPLETED |
| SAME        | Microbiome-Function-KEGG/GMM-rarefied | MF0126: propionate production via transferase           | old: NS           | new: NS           |
| SAME        | Microbiome-Function-KEGG/GMM-rarefied | M00140: C1-unit interconversion, prokaryotes            | old: NS           | new: NS           |
| SAME        | Microbiome-Function-KEGG/GMM-rarefied | M00140: C1-unit interconversion, prokaryotes            | old: YES-ENRICHED | new: YES-ENRICHED |
| SAME        | Microbiome-Function-KEGG/GMM-rarefied | M00140: C1-unit interconversion, prokaryotes            | old: NS           | new: NS           |
| SAME        | Microbiome-Function-KEGG/GMM-rarefied | MF0064: pectin degradation                              | old: YES-ENRICHED | new: YES-ENRICHED |
| SAME        | Microbiome-Function-KEGG/GMM-rarefied | MF0064: pectin degradation                              | old: YES-DEPLETED | new: YES-DEPLETED |
| SAME        | Microbiome-Function-KEGG/GMM-rarefied | MF0064: pectin degradation                              | old: NS           | new: NS           |
| SAME        | Microbiome-Function-KEGG/GMM-rarefied | MF0131: superoxide dismutase                            | old: NS           | new: NS           |
| SAME        | Microbiome-Function-KEGG/GMM-rarefied | MF0131: superoxide dismutase                            | old: YES-DEPLETED | new: YES-DEPLETED |
| SAME        | Microbiome-Function-KEGG/GMM-rarefied | MF0131: superoxide dismutase                            | old: NS           | new: NS           |
| SAME        | Microbiome-Function-KEGG/GMM-rarefied | M00260: DNA polymerase III complex, bacteria            | old: YES-DEPLETED | new: YES-DEPLETED |
| SAME        | Microbiome-Function-KEGG/GMM-rarefied | M00260: DNA polymerase III complex, bacteria            | old: YES-ENRICHED | new: YES-ENRICHED |
| SAME        | Microbiome-Function-KEGG/GMM-rarefied | M00260: DNA polymerase III complex, bacteria            | old: NS           | new: NS           |
| SAME        | Microbiome-Function-KEGG/GMM-rarefied | M00283: PTS system, ascorbate-specific II component     | old: NS           | new: NS           |
| SAME        | Microbiome-Function-KEGG/GMM-rarefied | M00283: PTS system, ascorbate-specific II component     | old: YES-DEPLETED | new: YES-DEPLETED |
| SAME        | Microbiome-Function-KEGG/GMM-rarefied | M00283: PTS system, ascorbate-specific II component     | old: YES-DEPLETED | new: YES-DEPLETED |
| SAME        | Microbiome-Function-KEGG/GMM-rarefied | MF0095: NADH:ferredoxin oxidoreductase                  | old: YES-DEPLETED | new: YES-DEPLETED |
| SAME        | Microbiome-Function-KEGG/GMM-rarefied | MF0095: NADH:ferredoxin oxidoreductase                  | old: NS           | new: NS           |
| SAME        | Microbiome-Function-KEGG/GMM-rarefied | MF0095: NADH:ferredoxin oxidoreductase                  | old: YES-DEPLETED | new: YES-DEPLETED |
| SAME        | Microbiome-Function-KEGG/GMM-rarefied | M00165: Reductive pentose phosphate cycle (Calvin cycl  | old: YES-DEPLETED | new: YES-DEPLETED |
| SAME        | Microbiome-Function-KEGG/GMM-rarefied | M00165: Reductive pentose phosphate cycle (Calvin cycl  | old: YES-ENRICHED | new: YES-ENRICHED |
| SAME        | Microbiome-Function-KEGG/GMM-rarefied | M00165: Reductive pentose phosphate cycle (Calvin cycl  | old: NS           | new: NS           |
| SAME        | Microbiome-Function-KEGG/GMM-rarefied | M00096: C5 isoprenoid biosynthesis, non-mevalonate pat  | old: NS           | new: NS           |
| SAME        | Microbiome-Function-KEGG/GMM-rarefied | M00096: C5 isoprenoid biosynthesis, non-mevalonate pat  | old: YES-ENRICHED | new: YES-ENRICHED |
| SAME        | Microbiome-Function-KEGG/GMM-rarefied | M00096: C5 isoprenoid biosynthesis, non-mevalonate pat  | old: NS           | new: NS           |
| SAME        | Microbiome-Function-KEGG/GMM-rarefied | MF0052: chondroitin sulfate and dermatan sulfate degrad | old: YES-ENRICHED | new: YES-ENRICHED |
| SAME        | Microbiome-Function-KEGG/GMM-rarefied | MF0052: chondroitin sulfate and dermatan sulfate degrad | old: NS           | new: NS           |
| SAME        | Microbiome-Function-KEGG/GMM-rarefied | MF0052: chondroitin sulfate and dermatan sulfate degrad | old: NS           | new: NS           |
| SAME        | Microbiome-Function-KEGG/GMM-rarefied | M00518: GlnK-GlnL (glutamine utilization) two-component | old: YES-DEPLETED | new: YES-DEPLETED |
| SAME        | Microbiome-Function-KEGG/GMM-rarefied | M00518: GlnK-GlnL (glutamine utilization) two-component | old: YES-ENRICHED | new: YES-ENRICHED |
| SAME        | Microbiome-Function-KEGG/GMM-rarefied | M00518: GlnK-GlnL (glutamine utilization) two-component | old: NS           | new: NS           |
| SAME        | Microbiome-Function-KEGG/GMM-rarefied | M00333: Type IV secretion system                        | old: NS           | new: NS           |
| SAME        | Microbiome-Function-KEGG/GMM-rarefied | MF0065: pectin degradation - 5-dehydro-4-deoxy-D-glucu  | old: YES-ENRICHED | new: YES-ENRICHED |
| SAME        | Microbiome-Function-KEGG/GMM-rarefied | MF0065: pectin degradation - 5-dehydro-4-deoxy-D-glucu  | old: NS           | new: NS           |
| SAME        | Microbiome-Function-KEGG/GMM-rarefied | MF0065: pectin degradation - 5-dehydro-4-deoxy-D-glucu  | old: NS           | new: NS           |
| SAME        | Microbiome-Function-KEGG/GMM-rarefied | M00167: Reductive pentose phosphate cycle, glyceraldeh  | old: YES-DEPLETED | new: YES-DEPLETED |
| SAME        | Microbiome-Function-KEGG/GMM-rarefied | M00167: Reductive pentose phosphate cycle, glyceraldeh  | old: YES-ENRICHED | new: YES-ENRICHED |
| SAME        | Microbiome-Function-KEGG/GMM-rarefied | M00167: Reductive pentose phosphate cycle, glyceraldeh  | old: NS           | new: NS           |
| SAME        | Microbiome-Function-KEGG/GMM-rarefied | M00029: Urea cycle                                      | old: NS           | new: NS           |
| SAME        | Microbiome-Function-KEGG/GMM-rarefied | M00029: Urea cycle                                      | old: YES-ENRICHED | new: YES-ENRICHED |
| SAME        | Microbiome-Function-KEGG/GMM-rarefied | M00029: Urea cycle                                      | old: NS           | new: NS           |
| SAME        | Microbiome-Function-KEGG/GMM-rarefied | M00366: C10-C20 isoprenoid biosynthesis, plants         | old: NS           | new: NS           |
| SAME        | Microbiome-Function-KEGG/GMM-rarefied | M00366: C10-C20 isoprenoid biosynthesis, plants         | old: YES-ENRICHED | new: YES-ENRICHED |
| SAME        | Microbiome-Function-KEGG/GMM-rarefied | M00366: C10-C20 isoprenoid biosynthesis, plants         | old: NS           | new: NS           |
| SAME        | Microbiome-Function-KEGG/GMM-rarefied | M00642: Multidrug resistance, efflux pump MexJK-OprM    | old: YES-ENRICHED | new: YES-ENRICHED |
| SAME        | Microbiome-Function-KEGG/GMM-rarefied | M00642: Multidrug resistance, efflux pump MexJK-OprM    | old: YES-DEPLETED | new: YES-DEPLETED |
| SAME        | Microbiome-Function-KEGG/GMM-rarefied | M00642: Multidrug resistance, efflux pump MexJK-OprM    | old: NS           | new: NS           |
| SAME        | Microbiome-Function-KEGG/GMM-rarefied | MF0003: acetylglucosamine degradation                   | old: NS           | new: NS           |
| SAME        | Microbiome-Function-KEGG/GMM-rarefied | MF0003: acetylglucosamine degradation                   | old: YES-DEPLETED | new: YES-DEPLETED |
| SAME        | Microbiome-Function-KEGG/GMM-rarefied | MF0003: acetylglucosamine degradation                   | old: NS           | new: NS           |
| SAME        | Microbiome-Function-KEGG/GMM-rarefied | M00552: D-galactonate degradation, De Ley-Doudoroff p   | old: NS           | new: NS           |
| SAME        | Microbiome-Function-KEGG/GMM-rarefied | M00552: D-galactonate degradation, De Ley-Doudoroff p   | old: YES-ENRICHED | new: YES-ENRICHED |
| SAME        | Microbiome-Function-KEGG/GMM-rarefied | M00552: D-galactonate degradation, De Ley-Doudoroff p   | old: NS           | new: NS           |
| SAME        | Microbiome-Function-KEGG/GMM-rarefied | M00276: PTS system, mannose-specific II component       | old: NS           | new: NS           |
| SAME        | Microbiome-Function-KEGG/GMM-rarefied | M00276: PTS system, mannose-specific II component       | old: YES-DEPLETED | new: YES-DEPLETED |
| SAME        | Microbiome-Function-KEGG/GMM-rarefied | M00276: PTS system, mannose-specific II component       | old: YES-DEPLETED | new: YES-DEPLETED |
| SAME        | Microbiome-Function-KEGG/GMM-rarefied | MF0104: nitrate reduction (dissimilatory)               | old: YES-ENRICHED | new: YES-ENRICHED |
| SAME        | Microbiome-Function-KEGG/GMM-rarefied | MF0104: nitrate reduction (dissimilatory)               | old: YES-DEPLETED | new: YES-DEPLETED |
| SAME        | Microbiome-Function-KEGG/GMM-rarefied | MF0104: nitrate reduction (dissimilatory)               | old: NS           | new: NS           |
| SAME        | Microbiome-Function-KEGG/GMM-rarefied | MF0047: lactose and galactose degradation (PTS)         | old: NS           | new: NS           |
| SAME        | Microbiome-Function-KEGG/GMM-rarefied | MF0047: lactose and galactose degradation (PTS)         | old: NS           | new: NS           |
| SAME        | Microbiome-Function-KEGG/GMM-rarefied | MF0047: lactose and galactose degradation (PTS)         | old: YES-DEPLETED | new: YES-DEPLETED |
| SAME        | Microbiome-Function-KEGG/GMM-rarefied | M00022: Shikimate pathway, phosphoenolpyruvate + eryt   | old: YES-DEPLETED | new: YES-DEPLETED |
| SAME        | Microbiome-Function-KEGG/GMM-rarefied | M00022: Shikimate pathway, phosphoenolpyruvate + eryt   | old: YES-ENRICHED | new: YES-ENRICHED |
| SAME        | Microbiome-Function-KEGG/GMM-rarefied | M00022: Shikimate pathway, phosphoenolpyruvate + eryt   | old: NS           | new: NS           |
| SAME        | Microbiome-Function-KEGG/GMM-rarefied | M00261: DNA polymerase alpha / primase complex          | old: YES-DEPLETED | new: YES-DEPLETED |
| SAME        | Microbiome-Function-KEGG/GMM-rarefied | M00261: DNA polymerase alpha / primase complex          | old: YES-ENRICHED | new: YES-ENRICHED |
| SAME        | Microbiome-Function-KEGG/GMM-rarefied | M00261: DNA polymerase alpha / primase complex          | old: NS           | new: NS           |
| SAME        | Microbiome-Function-KEGG/GMM-rarefied | M00171: C4-dicarboxylic acid cycle, NAD - malic enzyme  | old: YES-DEPLETED | new: YES-DEPLETED |
| SAME        | Microbiome-Function-KEGG/GMM-rarefied | M00171: C4-dicarboxylic acid cycle, NAD - malic enzyme  | old: YES-ENRICHED | new: YES-ENRICHED |
| SAME        | Microbiome-Function-KEGG/GMM-rarefied | M00171: C4-dicarboxylic acid cycle, NAD - malic enzyme  | old: NS           | new: NS           |
| SAME        | Microbiome-Function-KEGG/GMM-rarefied | M00214: Methyl-galactoside transport system             | old: YES-DEPLETED | new: YES-DEPLETED |
| SAME        | Microbiome-Function-KEGG/GMM-rarefied | M00214: Methyl-galactoside transport system             | old: YES-ENRICHED | new: YES-ENRICHED |
| SAME        | Microbiome-Function-KEGG/GMM-rarefied | M00214: Methyl-galactoside transport system             | old: NS           | new: NS           |
| SAME        | Microbiome-Function-KEGG/GMM-rarefied | M00439: Oligopeptide transport system                   | old: YES-DEPLETED | new: YES-DEPLETED |
| SAME        | Microbiome-Function-KEGG/GMM-rarefied | M00439: Oligopeptide transport system                   | old: YES-ENRICHED | new: YES-ENRICHED |
| SAME        | Microbiome-Function-KEGG/GMM-rarefied | M00439: Oligopeptide transport system                   | old: NS           | new: NS           |
| SAME        | Microbiome-Function-KEGG/GMM-rarefied | M00734: BraS-BraR (bacitracin transport) two-component  | old: YES-DEPLETED | new: YES-DEPLETED |
| SAME        | Microbiome-Function-KEGG/GMM-rarefied | M00734: BraS-BraR (bacitracin transport) two-component  | old: YES-ENRICHED | new: YES-ENRICHED |
| SAME        | Microbiome-Function-KEGG/GMM-rarefied | M00734: BraS-BraR (bacitracin transport) two-component  | old: NS           | new: NS           |
| SAME        | Microbiome-Function-KEGG/GMM-rarefied | M00049: Adenine ribonucleotide biosynthesis, IMP => AD  | old: NS           | new: NS           |
| SAME        | Microbiome-Function-KEGG/GMM-rarefied | M00049: Adenine ribonucleotide biosynthesis, IMP => AD  | old: YES-ENRICHED | new: YES-ENRICHED |
| SAME        | Microbiome-Function-KEGG/GMM-rarefied | M00049: Adenine ribonucleotide biosynthesis, IMP => AD  | old: NS           | new: NS           |
| SAME        | Microbiome-Function-KEGG/GMM-rarefied | M00737: Bacitracin resistance, VraDE transporter        | old: NS           | new: NS           |
| SAME        | Microbiome-Function-KEGG/GMM-rarefied | M00737: Bacitracin resistance, VraDE transporter        | old: NS           | new: NS           |
| SAME        | Microbiome-Function-KEGG/GMM-rarefied | M00166: Reductive pentose phosphate cycle, ribulose-5F  | old: YES-DEPLETED | new: YES-DEPLETED |
| SAME        | Microbiome-Function-KEGG/GMM-rarefied | M00166: Reductive pentose phosphate cycle, ribulose-5F  | old: YES-ENRICHED | new: YES-ENRICHED |
| SAME        | Microbiome-Function-KEGG/GMM-rarefied | M00166: Reductive pentose phosphate cycle, ribulose-5F  | old: NS           | new: NS           |
| SAME        | Microbiome-Function-KEGG/GMM-rarefied | MF0120: lactate consumption                             | old: NS           | new: NS           |
| SAME        | Microbiome-Function-KEGG/GMM-rarefied | MF0120: lactate consumption                             | old: NS           | new: NS           |
| SAME        | Microbiome-Function-KEGG/GMM-rarefied | MF0120: lactate consumption                             | old: YES-DEPLETED | new: YES-DEPLETED |
| SAME        | Microbiome-Function-KEGG/GMM-rarefied | M00456: ArcB-ArcA (anoxic redox control) two-componer   | old: NS           | new: NS           |







Table S4

| Concordance | Space                                      | Feature                                                  | Status, BMI-naive | Status, BMI-aware |
|-------------|--------------------------------------------|----------------------------------------------------------|-------------------|-------------------|
| SAME        | Microbiome-Taxonomy-Species-mOTU2-rarefied | Enterobacteriaceae sp. _C Escherichia coli_Escherichia f | old: NS           | new:NS            |
| SAME        | Microbiome-Taxonomy-Species-mOTU2-rarefied | Enterobacteriaceae sp. _C Escherichia coli_Escherichia f | old: YES-DEPLETED | new:YES-DEPLETED  |
| SAME        | Microbiome-Taxonomy-Species-mOTU2-rarefied | Oscillibacter sp. ER4                                    | old: NS           | new:NS            |
| SAME        | Microbiome-Taxonomy-Species-mOTU2-rarefied | Eubacterium sp. CAG:274                                  | old: YES-ENRICHED | new:YES-ENRICHED  |
| SAME        | Microbiome-Taxonomy-Species-mOTU2-rarefied | Eubacterium sp. CAG:274                                  | old: YES-DEPLETED | new:YES-DEPLETED  |
| SAME        | Microbiome-Taxonomy-Species-mOTU2-rarefied | Eubacterium sp. CAG:274                                  | old: NS           | new:NS            |
| SAME        | Microbiome-Taxonomy-Species-mOTU2-rarefied | Bacteroides sp. _C dorei_vulgatus_                       | old: NS           | new:NS            |
| SAME        | Microbiome-Taxonomy-Species-mOTU2-rarefied | Bacteroides sp. _C dorei_vulgatus_                       | old: YES-DEPLETED | new:YES-DEPLETED  |
| SAME        | Microbiome-Taxonomy-Species-mOTU2-rarefied | Bacteroides sp. _C dorei_vulgatus_                       | old: NS           | new:NS            |
| SAME        | Microbiome-Taxonomy-Species-mOTU2-rarefied | bacterium LF-3                                           | old: NS           | new:NS            |
| SAME        | Microbiome-Taxonomy-Species-mOTU2-rarefied | bacterium LF-3                                           | old: YES-DEPLETED | new:YES-DEPLETED  |
| SAME        | Microbiome-Taxonomy-Species-mOTU2-rarefied | bacterium LF-3                                           | old: NS           | new:NS            |
| SAME        | Microbiome-Taxonomy-Species-mOTU2-rarefied | Erysipelotrichaceae sp. _C Coprobacillus_Erysipelatoclos | old: YES-ENRICHED | new:YES-ENRICHED  |
| SAME        | Microbiome-Taxonomy-Species-mOTU2-rarefied | Erysipelotrichaceae sp. _C Coprobacillus_Erysipelatoclos | old: YES-DEPLETED | new:YES-DEPLETED  |
| SAME        | Microbiome-Taxonomy-Species-mOTU2-rarefied | Erysipelotrichaceae sp. _C Coprobacillus_Erysipelatoclos | old: NS           | new:NS            |
| SAME        | Microbiome-Taxonomy-Species-mOTU2-rarefied | Roseburia hominis                                        | old: YES-ENRICHED | new:YES-ENRICHED  |
| SAME        | Microbiome-Taxonomy-Species-mOTU2-rarefied | Roseburia hominis                                        | old: YES-DEPLETED | new:YES-DEPLETED  |
| SAME        | Microbiome-Taxonomy-Species-mOTU2-rarefied | Roseburia hominis                                        | old: NS           | new:NS            |
| SAME        | Microbiome-Taxonomy-Species-mOTU2-rarefied | Coprococcus comes                                        | old: NS           | new:NS            |
| SAME        | Microbiome-Taxonomy-Species-mOTU2-rarefied | Alistipes obesi                                          | old: NS           | new:NS            |
| SAME        | Microbiome-Taxonomy-Species-mOTU2-rarefied | Alistipes obesi                                          | old: YES-ENRICHED | new:YES-ENRICHED  |
| SAME        | Microbiome-Taxonomy-Species-mOTU2-rarefied | Alistipes obesi                                          | old: NS           | new:NS            |
| SAME        | Microbiome-Taxonomy-Species-mOTU2-rarefied | Dialister invisus                                        | old: YES-DEPLETED | new:YES-DEPLETED  |
| SAME        | Microbiome-Taxonomy-Species-mOTU2-rarefied | Dialister invisus                                        | old: YES-ENRICHED | new:YES-ENRICHED  |
| SAME        | Microbiome-Taxonomy-Species-mOTU2-rarefied | Dialister invisus                                        | old: NS           | new:NS            |
| SAME        | Microbiome-Taxonomy-Species-mOTU2-rarefied | Oscillibacter sp. 57_20                                  | old: NS           | new:NS            |
| SAME        | Microbiome-Taxonomy-Species-mOTU2-rarefied | Oscillibacter sp. 57_20                                  | old: YES-ENRICHED | new:YES-ENRICHED  |
| SAME        | Microbiome-Taxonomy-Species-mOTU2-rarefied | Oscillibacter sp. 57_20                                  | old: NS           | new:NS            |
| SAME        | Microbiome-Taxonomy-Species-mOTU2-rarefied | _Clostridium_asparagiforme                               | old: NS           | new:NS            |
| SAME        | Microbiome-Taxonomy-Species-mOTU2-rarefied | _Clostridium_asparagiforme                               | old: NS           | new:NS            |
| SAME        | Microbiome-Taxonomy-Species-mOTU2-rarefied | Roseburia sp. 40_7                                       | old: YES-DEPLETED | new:YES-DEPLETED  |
| SAME        | Microbiome-Taxonomy-Species-mOTU2-rarefied | Roseburia sp. 40_7                                       | old: YES-ENRICHED | new:YES-ENRICHED  |
| SAME        | Microbiome-Taxonomy-Species-mOTU2-rarefied | Roseburia sp. 40_7                                       | old: NS           | new:NS            |
